# Supplementary material for: Regioisomeric core–shell cuprofullerene C60@Cu24
Source: Royal Society of Chemistry journal article supplement (doi:10.1039/d2cc00683a), 2022-01-01
Supplement: d2cc00683a1.pdf [file d2cc00683a1.pdf]

## ***Electronic Supplementary Information (ESI)***

### **Regioisomeric Core-shell Cuprofullerene C<sub>60</sub>@Cu<sub>24</sub>**

You-Shi Guo,<sup>a</sup> Shun-Ze Zhan,<sup>\*ab</sup> Jia-Jing Zhong,<sup>a</sup> Weigang Lu<sup>b</sup>, Seik Weng Ng<sup>c</sup> and Dan Li<sup>\*b</sup>

<sup>a</sup> Department of Chemistry and Key Laboratory for Preparation and Application of Ordered Structural Materials of Guangdong Province, Shantou University, Shantou 515063, P. R. China  
*\*Email:* [szzhan@stu.edu.cn](mailto:szzhan@stu.edu.cn)

<sup>b</sup> College of Chemistry and Materials Science, and Guangdong Provincial Key Laboratory of Functional Supramolecular Coordination Materials and Applications, Jinan University, Guangzhou 510632, P. R. China *\*Email:* [danli@jnu.edu.cn](mailto:danli@jnu.edu.cn)

<sup>c</sup> UCSI University, Cheras, Kuala Lumpur, Malaysia

## **Content**

|     |                                          |    |
|-----|------------------------------------------|----|
| 1   | Experimental Procedures .....            | 2  |
| 1.1 | Materials and Physical Measurements..... | 2  |
| 1.2 | Synthesis .....                          | 2  |
| 1.3 | Crystal Structural Determination.....    | 4  |
| 2   | Results and Discussion .....             | 6  |
| 2.1 | Crystal Data .....                       | 6  |
| 2.2 | Additional Structural Description.....   | 19 |
| 3   | References.....                          | 33 |

# 1 Experimental Procedures

## 1.1 Materials and Physical Measurements

Commercially available starting materials and solvents were used without further purification. C<sub>60</sub> (99.5%) was purchased from Xiamen Funano New Material Technology Company LTD without purifications. Single crystal X-ray data collection for the material was performed on a Rigaku OD (Enhance Cu X-ray Source, K $\alpha$ ,  $\lambda$  = 1.54184 Å) with CCD Plate (XtaLAB Pro: Kappa single) under 100 K. Thermogravimetric analysis (TGA) was performed on a TA Instruments Q50 Thermogravimetric Analyzer under a nitrogen flow of 40 mL·min<sup>-1</sup> at a heating rate of 20 °C·min<sup>-1</sup>. Powder X-ray diffraction (PXRD) experiment was performed on a MiniFlex 600 X-ray diffractometer of Rigaku Corporation. Infrared spectrum (IR) was obtained in KBr pellet on a Nicolet Avatar 360 FTIR spectrometer in the range of 4000–500 cm<sup>-1</sup>; abbreviations used for the IR bands are: w = weak, m = medium, s = strong, vs = very strong. The diffuse reflectance solid-state UV-Vis spectra of these complexes were obtained on a Lambda950 UV/Vis/NIR spectrophotometer of Perkin Elmer using pure powder sample and pure BaSO<sub>4</sub> as background.

## 1.2 Synthesis

**Complex 1:** A mixture of Cu<sub>2</sub>O (10.0 mg, 0.07 mmol), trifluoroacetic acid (CF<sub>3</sub>COOH, 15  $\mu$ L, 0.20 mmol), 4-methylbenzoic acid (15 mg, 0.11 mmol) and C<sub>60</sub>-saturated toluene solution (1.0 mL, 3.0 mg/mL, 0.0042 mmol) was sealed in a Pyrex tube with an 8.0 mm inner diameter (6.0 mL volume). Then the tube was heated at 180 °C in a programmable oven for 72 h and cooled to room temperature at the rate of -5 °C·h<sup>-1</sup>. Red block crystals were separated mechanically. Yield: 18.4 mg, 67.2% (based on C<sub>60</sub>). IR data (KBr, cm<sup>-1</sup>): 1681 vs, 1612 s, 1542 m, 1430 m, 1290 m, 1203 vs, 1141 s, 1022 w, 842 m, 727 s, 526 m.

**Complex 2:** A mixture of Cu<sub>2</sub>O (10.0 mg, 0.07 mmol), trifluoroacetic acid (CF<sub>3</sub>COOH, 90  $\mu$ L, 1.22 mmol), thiodiglycolic acid (10.5 mg, 0.07 mmol) and C<sub>60</sub>-saturated toluene solution (1.0 mL, 3.0 mg/mL, 0.0042 mmol) was sealed in a Pyrex

tube with an 8.0 mm inner diameter (6.0 mL volume). Then the tube was heated at 180 °C in a programmable oven for 72 h and cooled to room temperature at the rate of  $-5\text{ }^{\circ}\text{C}\cdot\text{h}^{-1}$ . Red block crystals were separated mechanically. Yield: 2.1 mg, 7.9% based on  $\text{C}_{60}$ . IR data (KBr,  $\text{cm}^{-1}$ ): 3423 s, 1673 s, 1650 s, 1589 s, 1374 s, 1205 s, 1141 s, 933 s, 848 m, 790 w, 725 s, 659 w, 514 m.

**Complex 3:** A mixture of  $\text{Cu}_2\text{O}$  (10.0 mg, 0.07 mmol), trifluoroacetic acid ( $\text{CF}_3\text{COOH}$ , 50  $\mu\text{L}$ , 0.68 mmol), thiodiglycolic acid (10.5 mg, 0.07 mmol) and  $\text{C}_{60}$ -saturated toluene solution (1.0 mL, 3.0 mg/mL, 0.0042 mmol) was sealed in a Pyrex tube with an 8.0 mm inner diameter (6.0 mL volume). Then the tube was heated at 180 °C in a programmable oven for 72 h and cooled to room temperature at the rate of  $-5\text{ }^{\circ}\text{C}\cdot\text{h}^{-1}$ . Red block crystals were separated mechanically. Yield: 1.5 mg, 6.0% based on  $\text{C}_{60}$ . IR data (KBr,  $\text{cm}^{-1}$ ): 3446 s, 1681 s, 1644 s, 1598 vs, 1560 vs, 1407 s, 1199 s, 1141 s, 931 w, 840 w, 790 w, 707 m, 570 w, 516 m.

Note that: The red crystal samples of the complexes **1**, **2** and **3** will turn into dark color after tens of minutes in air, losing their crystalline. So immediate measurements are necessary to ensure their crystalline purity.

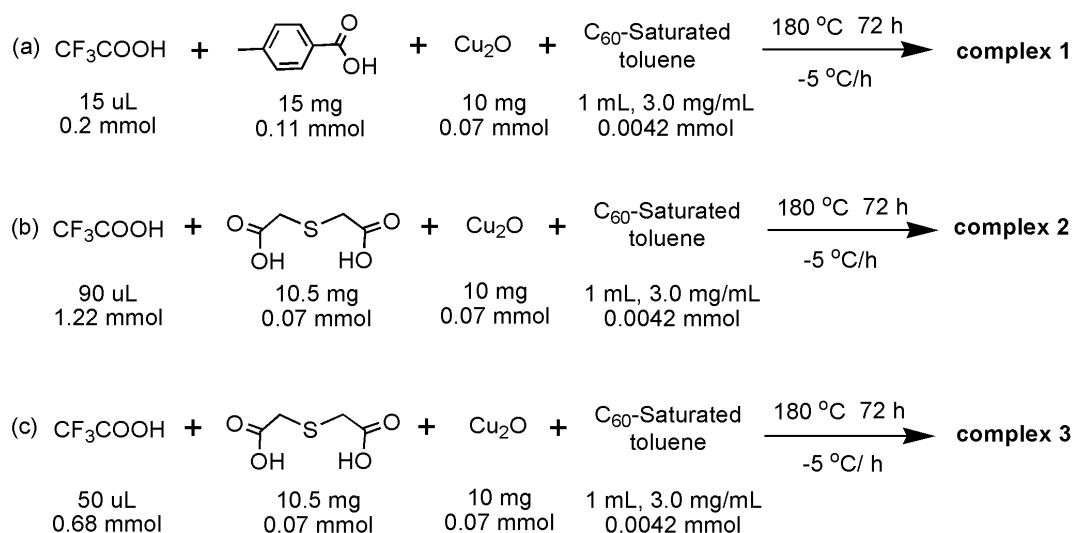

**Scheme S1** Synthesis reactions of the cuprofullerene complexes **1**, **2** and **3**.

### 1.3 Crystal Structural Determination

Data collection for the adduct was performed on a Rigaku OD (Enhance Cu X-ray Source,  $K\alpha$ ,  $\lambda = 1.54184 \text{ \AA}$ ) with CCD Plate (XtaLAB Pro: Kappa single) under 100 K. Data were processed with the CrysAlisPro 1.171.39.28b (Rigaku Oxford Diffraction, 2015).

Structures were solved by direct methods by ShelXS<sup>[1]</sup> in Olex2 1.2<sup>[2]</sup> and refined on  $F^2$  using full-matrix least-squares (SHELXL-2017/1<sup>[1]</sup> in Olex2 1.2<sup>[2]</sup>). All non-hydrogen atoms were refined with anisotropic thermal parameters, and all hydrogen atoms were included in calculated positions and refined with isotropic thermal parameters riding on those of the parent atoms. SQUEEZE program<sup>[3]</sup> was used to remove the contributions of disordered guest molecules. Crystal data and structure refinement for the complex were summarized in Table S1. Selected bond lengths and angles were given in Table S2 and Table S3.

#### Note that:

Complex 1:  $\text{Cu}_{24}(\text{C}_{60})_2(\text{C}_8\text{H}_8\text{O}_2)_{12}(\text{C}_2\text{F}_3\text{O}_2)_{24}$

The  $\text{C}_{60}$  sphere lies on a site of -3 Wyckoff symmetry. The acid hydrogen atom of the *p*-toluic acid was located and refined with a distance restraint of O–H  $0.84 \pm 0.01 \text{ \AA}$ .

Complex 2:  $[\text{Cu}_{34}(\text{H}_2\text{O})_2(\text{C}_{60})(\text{C}_2\text{F}_3\text{O}_2)_8(\text{C}_4\text{H}_4\text{O}_4\text{S})_{14}] \cdot 2\text{C}_7\text{H}_8 \cdot 2\text{C}_2\text{F}_3\text{O}_2\text{H} \cdot 2\text{C}_4\text{H}_6\text{O}_4\text{S}$

The  $\text{C}_{60}$  sphere lies on a site of -1 Wyckoff symmetry. The acid hydrogen atom of the free  $\text{CF}_3\text{CO}_2\text{H}$  was located and refined with a distance restraint of O–H  $0.84 \pm 0.01 \text{ \AA}$ . The H-atoms of the coordinated water molecule were generated geometrically; only one of the two forms a hydrogen bond to an acceptor O atom.

One of the  $\text{C}_4\text{H}_4\text{O}_4\text{S}^{2-}$  units is disordered over two positions. The occupancy of each component was set to 0.5, and pairs of bond distances were restrained to within  $0.01 \text{ \AA}$  of each other; the anisotropic displacement parameters of the unprimed and primed atoms were made to be identical.

The refinement initially converged at an  $R$  of 0.064, but the difference Fourier map had excess electron density (181 electron counts) in a  $509 \text{ \AA}^3$  void centered at (0,0,0). The electron density was assumed as two thiodiglycolic acid molecules ( $\text{C}_4\text{H}_6\text{O}_4\text{S}$  has

78 electrons). The molecular volume of thiodiglycolic acid itself when calculated from its estimated  $1.352 \text{ g/cm}^3$  is approximately  $184 \text{ \AA}^3$ . The diffraction measurements are of a sufficiently high quality for the electrons to be squeezed out, and the refinement converged to a slightly lower value of 0.052.

The entity is unlikely to be toluene (64 electrons); the molecular volume of the two phases of toluene is much smaller, at about  $140 \text{ \AA}^3$  only [M. Anderson, Bosio, J. Bruneaux-Pouille and R. Fourme, *J Chim. Phys.* 74, 68-73 (1977); J. Bruneaux-Pouille and L. Bosio, *J. Mol. Struct.* 81, 253-259 (1982)]. The possibility of trifluoroacetic acid is also excluded as its molecular volume of  $91 \text{ \AA}^3$  is too small [I. Nahrungbauer, J.-O. Lundgren and E. K. Andersen, *Acta Cryst.* B35, 508-510 (1979)].

**Complex 3:**  $[\text{Cu}_{32}(\text{C}_{60})(\text{C}_2\text{F}_3\text{O}_2)_{12}(\text{C}_4\text{H}_4\text{O}_4\text{S})_{10}(\text{C}_4\text{H}_6\text{O}_4\text{S})_2] \cdot \text{C}_7\text{H}_8$

The  $\text{C}_{60}$  sphere lies on a site of -1 Wyckoff symmetry. For one of the six independent thiodiglycolate groups, one  $-\text{CO}_2$  end (C–O 1.23, 1.30  $\text{\AA}$ ) is within hydrogen-bonding range of another thiodiglycolate (that has delocalized C–O bonds of 1.25, 1.25  $\text{\AA}$ ). An acid hydrogen is placed on this end of the thiodiglycolate group. Its other  $-\text{CO}_2$  end (C–O 1.21, 1.31  $\text{\AA}$ ) has its presumably singly-bonded O atom within hydrogen bonding range of a presumably singly-bonded O atom of a trifluoroacetate group (C–O 1.24, 1.29  $\text{\AA}$ ). Because the acid hydrogen cannot be assigned to either the thiodiglycolate or the trifluoroacetate group, this atom is arbitrarily placed mid-way between these two singly-bonded O ends. Consequently, the formula can also be represented as  $[\text{Cu}_{32}(\text{C}_{60})(\text{C}_2\text{F}_3\text{O}_2)_{10}(\text{C}_2\text{F}_3\text{O}_2\text{H})_2(\text{C}_4\text{H}_4\text{O}_4\text{S})_{10}(\text{C}_4\text{H}_5\text{O}_4\text{S})_2] \cdot \text{C}_7\text{H}_8$ .

## 2 Results and Discussion

### 2.1 Crystal Data

**Table S1** Crystal data and structure refinements for the complexes measured at 100 K

| Complexes                                | <b>1</b>                                                                          | <b>2</b>                                                                                          | <b>3</b>                                                                                          |
|------------------------------------------|-----------------------------------------------------------------------------------|---------------------------------------------------------------------------------------------------|---------------------------------------------------------------------------------------------------|
| CCDC                                     | 2109671                                                                           | 2090423                                                                                           | 2090424                                                                                           |
| Chemical formula                         | C <sub>204</sub> H <sub>96</sub> Cu <sub>24</sub> F <sub>72</sub> O <sub>72</sub> | C <sub>150</sub> H <sub>78</sub> Cu <sub>34</sub> F <sub>30</sub> O <sub>78</sub> S <sub>14</sub> | C <sub>139</sub> H <sub>60</sub> Cu <sub>32</sub> F <sub>36</sub> O <sub>72</sub> S <sub>12</sub> |
| Formula weight                           | 6592.01                                                                           | 6307.67                                                                                           | 5984.19                                                                                           |
| Crystal system                           | trigonal                                                                          | triclinic                                                                                         | monoclinic                                                                                        |
| Space group                              | <i>R</i> -3                                                                       | <i>P</i> -1                                                                                       | <i>P</i> 2 <sub>1</sub> / <i>n</i>                                                                |
| a (Å)                                    | 32.3438(3)                                                                        | 17.0534(3)                                                                                        | 17.0045(3)                                                                                        |
| b (Å)                                    | 32.3438(3)                                                                        | 17.7446(4)                                                                                        | 19.5007(4)                                                                                        |
| c (Å)                                    | 18.0340(2)                                                                        | 18.0961(4)                                                                                        | 24.9159(6)                                                                                        |
| α (deg)                                  | 90                                                                                | 64.831(2)                                                                                         | 90                                                                                                |
| β (deg)                                  | 90                                                                                | 74.884(2)                                                                                         | 91.855(2)                                                                                         |
| γ (deg)                                  | 120                                                                               | 74.914(2)                                                                                         | 90                                                                                                |
| V (Å <sup>3</sup> )                      | 16338.2(4)                                                                        | 4714.17(19)                                                                                       | 8257.8(3)                                                                                         |
| Z                                        | 3                                                                                 | 1                                                                                                 | 2                                                                                                 |
| D <sub>calc</sub> (g.cm <sup>-3</sup> )  | 2.010                                                                             | 2.222                                                                                             | 2.407                                                                                             |
| μ (mm <sup>-1</sup> )                    | 3.809                                                                             | 6.528                                                                                             | 6.952                                                                                             |
| Reflections collected                    | 16363                                                                             | 49253                                                                                             | 46534                                                                                             |
| Unique                                   | 7079                                                                              | 15798                                                                                             | 16308                                                                                             |
| R <sub>int</sub>                         | 0.0201                                                                            | 0.0491                                                                                            | 0.0512                                                                                            |
| GOF                                      | 1.040                                                                             | 1.052                                                                                             | 1.056                                                                                             |
| R <sub>1</sub> <sup>a</sup> [I > 2σ(I)]  | 0.0411                                                                            | 0.0517                                                                                            | 0.0643                                                                                            |
| wR <sub>2</sub> <sup>b</sup> [I > 2σ(I)] | 0.1210                                                                            | 0.1357                                                                                            | 0.1822                                                                                            |
| R <sub>1</sub> <sup>a</sup> [all refl.]  | 0.0445                                                                            | 0.0659                                                                                            | 0.0752                                                                                            |
| wR <sub>2</sub> <sup>b</sup> [all refl.] | 0.1237                                                                            | 0.1445                                                                                            | 0.1926                                                                                            |

<sup>a</sup>  $R_1 = \sum(|F_o| - |F_c|) / \sum|F_o|$ . <sup>b</sup>  $wR_2 = [\sum w(F_o^2 - F_c^2)^2 / \sum w(F_o^2)^2]^{1/2}$ .

**Table S2** Comparison of the selected bond lengths (Å) in the complexes **1**, **2** and **3**.

| Bond lengths (Å)        |          |                        |          |           |          |
|-------------------------|----------|------------------------|----------|-----------|----------|
| <b>1</b>                |          | <b>2</b>               |          | <b>3</b>  |          |
| Cu-O(L <sub>F</sub> )   |          |                        |          |           |          |
| Cu1-O1                  | 1.956(2) | Cu1-O2#1               | 2.279(4) | Cu1-O2#1  | 2.254(4) |
| Cu1-O6                  | 1.960(2) | Cu2-O7                 | 2.264(4) | Cu2-O7    | 2.285(4) |
| Cu2-O2                  | 1.974(2) | Cu4-O7                 | 2.270(4) | Cu4-O7    | 2.251(5) |
| Cu2-O3                  | 1.997(2) | Cu4-O9                 | 1.955(4) | Cu4-O9    | 1.951(5) |
| Cu3-O4                  | 1.968(2) | Cu5-O10                | 1.987(4) | Cu5-O10   | 1.995(5) |
| Cu3-O5                  | 1.978(2) | Cu7-O21#1              | 2.304(4) | Cu7-O21#1 | 2.225(4) |
| Cu4-O11                 | 1.930(2) | Cu8-O17#1              | 2.035(5) | Cu8-O17   | 1.950(5) |
| Cu4-O12#2               | 1.964(2) | Cu9-O18                | 1.945(4) | Cu9-O18   | 1.966(5) |
|                         |          | Cu9-O19                | 1.980(4) | Cu9-O19#1 | 2.001(4) |
|                         |          | Cu9-O24                | 2.319(4) | Cu9-O24#1 | 2.328(4) |
|                         |          | Cu13-O14               | 2.291(4) | Cu13-O14  | 2.280(4) |
|                         |          | Cu14-O23               | 1.895(4) | Cu14-O23  | 1.908(5) |
|                         |          | Cu16-O22               | 1.930(4) | Cu16-O22  | 2.005(5) |
|                         |          |                        |          | Cu5-O35#1 | 2.308(5) |
|                         |          |                        |          | Cu10-O33  | 2.029(5) |
|                         |          |                        |          | Cu11-O34  | 1.948(5) |
|                         |          |                        |          | Cu12-O35  | 2.122(6) |
| average                 | 1.966    | average                | 2.112    | average   | 2.106    |
| Cu-O(HL <sub>mb</sub> ) |          | Cu-O (L <sub>s</sub> ) |          |           |          |
| Cu1-O9#1                | 2.272(2) | Cu1-O1                 | 1.945(4) | Cu1-O1    | 1.949(4) |
| Cu2-O7                  | 2.202(2) | Cu1-O6                 | 1.969(4) | Cu1-O6    | 1.958(4) |
| Cu3-O9#1                | 2.243(2) | Cu2-O2                 | 1.958(4) | Cu2-O2    | 1.960(4) |
| Cu4-O7#3                | 2.351(2) | Cu2-O3                 | 1.964(4) | Cu2-O3    | 1.970(4) |
|                         |          | Cu3-O4                 | 1.992(4) | Cu3-O4    | 1.985(4) |

|  |  |           |          |            |          |
|--|--|-----------|----------|------------|----------|
|  |  | Cu3-O5    | 1.977(4) | Cu3-O5     | 1.967(4) |
|  |  | Cu3-O25   | 2.245(4) | Cu3-O25    | 2.296(5) |
|  |  | Cu4-O14   | 1.966(4) | Cu4-O14    | 1.975(4) |
|  |  | Cu5-O11   | 1.937(4) | Cu5-O11    | 1.947(5) |
|  |  | Cu6-O12   | 1.967(4) | Cu6-O12    | 1.954(4) |
|  |  | Cu6-O13   | 1.957(4) | Cu6-O13    | 1.957(4) |
|  |  | Cu6-O24   | 2.353(4) | Cu6-O24    | 2.404(5) |
|  |  | Cu7-O15#1 | 1.981(4) | Cu7-O15#1  | 1.995(4) |
|  |  | Cu7-O20   | 1.929(4) | Cu7-O20    | 1.952(4) |
|  |  | Cu8-O16   | 1.982(4) | Cu8-O16    | 1.994(5) |
|  |  | Cu8-O31#1 | 2.020(5) | Cu8-O31#1  | 2.222(5) |
|  |  | Cu10-O24  | 2.359(4) | Cu10-O24#1 | 2.292(4) |
|  |  | Cu10-O25  | 2.352(4) | Cu10-O25#1 | 2.342(4) |
|  |  | Cu11-O25  | 2.452(4) | Cu11-O25#1 | 2.402(4) |
|  |  | Cu11-O27  | 2.001(4) | Cu11-O27#1 | 2.001(4) |
|  |  | Cu12-O28  | 1.926(4) | Cu12-O28   | 1.904(5) |
|  |  | Cu12-O29  | 2.030(3) | Cu12-O29   | 2.061(6) |
|  |  | Cu13-O3   | 2.510(4) | Cu13-O3    | 2.437(5) |
|  |  | Cu13-O8   | 1.919(4) | Cu13-O8    | 1.911(5) |
|  |  | Cu14-O19  | 2.290(4) | Cu14-O19   | 2.271(4) |
|  |  | Cu15-O26  | 1.903(4) | Cu15-O26   | 1.905(5) |
|  |  | Cu15-O27  | 2.219(4) | Cu15-O27   | 2.265(4) |
|  |  | Cu16-O15  | 2.249(4) | Cu16-O15   | 2.267(4) |
|  |  | Cu17-O30A | 1.860(3) |            |          |
|  |  | Cu17-O30B | 2.130(3) |            |          |
|  |  | Cu17-O32A | 1.990(4) |            |          |
|  |  | Cu17-O32B | 1.910(3) |            |          |



|                   |          |                         |          |           |           |
|-------------------|----------|-------------------------|----------|-----------|-----------|
|                   |          | Cu10-O33                | 1.986(4) |           |           |
|                   |          | Cu11-O34                | 1.967(4) |           |           |
|                   |          | Cu17-O34                | 2.352(4) |           |           |
|                   |          | Cu17-O35                | 1.992(5) |           |           |
| average           | 2.267    | average                 | 2.071    | average   | 2.091     |
|                   |          | Cu-O (H <sub>2</sub> O) |          |           |           |
|                   |          | Cu5-O37#1               | 2.299(4) |           |           |
|                   |          | Cu12-O37                | 2.288(4) |           |           |
|                   |          | average                 | 2.294    |           |           |
|                   |          | Cu-S                    |          |           |           |
|                   |          | Cu10-S4                 | 2.312(2) | Cu10-S4#1 | 2.321(2)  |
|                   |          | Cu13-S2                 | 2.188(2) | Cu13-S2   | 2.184(2)  |
|                   |          | Cu14-S3                 | 2.175(2) | Cu14-S3   | 2.186 (2) |
|                   |          | Cu15-S5                 | 2.171(2) | Cu15-S5   | 2.173(2)  |
|                   |          | Cu16-S1                 | 2.196(2) | Cu16-S1   | 2.225(2)  |
|                   |          | Cu17-S6A                | 2.530(2) | Cu16-S6#3 | 2.333(2)  |
|                   |          | Cu17-S6B                | 2.540(2) |           |           |
|                   |          | Cu17-S7                 | 2.341(2) |           |           |
|                   |          | average                 | 2.307    | average   | 2.237     |
| Cu-Cu (canopying) |          |                         |          |           |           |
| Cu1-Cu2           | 3.278(2) | Cu1-Cu2                 | 3.260(7) | Cu1-Cu2   | 3.222(6)  |
| Cu1-Cu3           | 3.317(2) | Cu1-Cu3                 | 3.160(7) | Cu1-Cu3   | 3.160(6)  |
| Cu2-Cu3           | 3.365(2) | Cu1-Cu7                 | 3.453(8) | Cu1-Cu7   | 3.437(7)  |
| Cu2-Cu4           | 3.460(2) | Cu2-Cu3                 | 3.204(7) | Cu2-Cu3   | 3.202(6)  |
|                   |          | Cu2-Cu4                 | 3.425(8) | Cu2-Cu4   | 3.389(7)  |
|                   |          | Cu3-Cu10                | 3.516(8) | Cu3-Cu10  | 3.506(7)  |
|                   |          | Cu3-Cu11                | 3.480(8) | Cu3-Cu11  | 3.457(7)  |

|                  |          |           |          |           |          |
|------------------|----------|-----------|----------|-----------|----------|
|                  |          | Cu4-Cu5   | 3.255(7) | Cu4-Cu5   | 3.291(6) |
|                  |          | Cu4-Cu6   | 3.261(7) | Cu4-Cu6   | 3.261(6) |
|                  |          | Cu5-Cu12  | 3.438(8) | Cu5-Cu12  | 3.506(7) |
|                  |          | Cu6-Cu9   | 3.416(8) | Cu6-Cu9   | 3.450(7) |
|                  |          | Cu6-Cu10  | 3.592(8) | Cu6-Cu10  | 3.605(7) |
|                  |          | Cu7-Cu8   | 3.283(8) | Cu7-Cu8   | 3.274(6) |
|                  |          | Cu7-Cu9   | 3.250(7) | Cu7-Cu9   | 3.255(6) |
|                  |          | Cu8-Cu9   | 3.417(8) | Cu8-Cu9   | 3.296(6) |
|                  |          | Cu9-Cu10  | 3.440(8) | Cu9-Cu10  | 3.488(7) |
|                  |          | Cu10-Cu11 | 3.304(8) | Cu10-Cu11 | 3.267(6) |
|                  |          | Cu11-Cu12 | 3.240(7) | Cu11-Cu12 | 3.217(6) |
| average          | 3.355    | average   | 3.355    | average   | 3.349    |
| Cu-Cu (standing) |          |           |          |           |          |
|                  |          | Cu2-Cu13  | 3.751(9) | Cu2-Cu13  | 3.714(7) |
|                  |          | Cu3-Cu15  | 3.753(9) | Cu3-Cu15  | 3.868(8) |
|                  |          | Cu4-Cu13  | 3.521(8) | Cu4-Cu13  | 3.482(7) |
|                  |          | Cu6-Cu14  | 3.773(9) | Cu6-Cu14  | 3.721(7) |
|                  |          | Cu7-Cu16  | 3.500(8) | Cu7-Cu16  | 3.632(7) |
|                  |          | Cu9-Cu14  | 3.557(8) | Cu9-Cu14  | 3.549(7) |
|                  |          | Cu11-Cu15 | 3.542(8) | Cu11-Cu15 | 3.610(7) |
|                  |          | Cu11-Cu17 | 3.484(8) |           |          |
|                  |          | average   | 3.610    | average   | 3.654    |
| Cu-C             |          |           |          |           |          |
| Cu1-C1           | 2.016(3) | Cu1-C1#1  | 2.015(5) | Cu1-C1#1  | 2.017(6) |
| Cu1-C2           | 2.016(3) | Cu1-C2#1  | 2.019(5) | Cu1-C2#1  | 2.007(5) |
| Cu2-C3#2         | 2.015(3) | Cu2-C3    | 2.008(5) | Cu2-C3    | 2.017(5) |
| Cu2-C4#2         | 2.016(3) | Cu2-C4    | 2.015(5) | Cu2-C4    | 2.018(6) |

|                       |          |            |          |            |          |
|-----------------------|----------|------------|----------|------------|----------|
| Cu3-C5                | 2.010(3) | Cu3-C5     | 2.027(5) | Cu3-C5#1   | 2.033(5) |
| Cu3-C6                | 2.014(3) | Cu3-C6     | 2.028(5) | Cu3-C6#1   | 2.038(5) |
| Cu4-C7                | 2.031(3) | Cu4-C7     | 2.009(6) | Cu4-C7     | 1.997(5) |
| Cu4-C8                | 1.990(3) | Cu4-C8     | 2.006(5) | Cu4-C8     | 2.026(6) |
|                       |          | Cu5-C9     | 1.996(6) | Cu5-C9     | 2.019(6) |
|                       |          | Cu5-C10    | 2.031(5) | Cu5-C10    | 2.044(6) |
|                       |          | Cu6-C11#1  | 2.004(5) | Cu6-C11    | 2.008(6) |
|                       |          | Cu6-C12#1  | 2.020(6) | Cu6-C12    | 2.013(6) |
|                       |          | Cu7-C13    | 2.039(5) | Cu7-C13#1  | 2.034(6) |
|                       |          | Cu7-C14    | 1.983(5) | Cu7-C14#1  | 2.012(6) |
|                       |          | Cu8-C15    | 2.027(5) | Cu8-C15    | 2.013(6) |
|                       |          | Cu8-C16    | 2.050(6) | Cu8-C16    | 2.015(6) |
|                       |          | Cu9-C17#1  | 2.043(6) | Cu9-C17#1  | 2.072(6) |
|                       |          | Cu9-C18#1  | 1.974(5) | Cu9-C18#1  | 2.006(6) |
|                       |          | Cu10-C19   | 1.972(5) | Cu10-C19   | 1.974(6) |
|                       |          | Cu10-C20   | 2.052(5) | Cu10-C20   | 2.086(6) |
|                       |          | Cu11-C21#1 | 2.052(5) | Cu11-C21   | 2.062(5) |
|                       |          | Cu11-C22#1 | 1.998(5) | Cu11-C22   | 1.995(6) |
|                       |          | Cu12-C23#1 | 1.987(5) | Cu12-C23#1 | 2.038(6) |
|                       |          | Cu12-C24#1 | 1.988(5) | Cu12-C24#1 | 2.050(5) |
| average               | 2.014    | average    | 2.014    | average    | 2.025    |
| C-C (coordinated C=C) |          |            |          |            |          |
| C1-C2                 | 1.445(4) | C1-C2      | 1.427(8) | C1-C2      | 1.419(8) |
| C3-C4                 | 1.433(4) | C3-C4      | 1.417(8) | C3-C4      | 1.439(8) |
| C5-C6                 | 1.442(4) | C5-C6      | 1.416(8) | C5-C6      | 1.435(8) |
| C7-C8                 | 1.432(4) | C7-C8      | 1.435(7) | C7-C8      | 1.425(8) |
|                       |          | C9-C10     | 1.424(8) | C9-C10     | 1.426(9) |

|                                                     |          |                     |          |                                                                                 |          |
|-----------------------------------------------------|----------|---------------------|----------|---------------------------------------------------------------------------------|----------|
|                                                     |          | C11-C12             | 1.4277)  | C11-C12                                                                         | 1.443(8) |
|                                                     |          | C13-C14             | 1.433(8) | C13-C14                                                                         | 1.426(8) |
|                                                     |          | C15-C16             | 1.435(7) | C15-C16                                                                         | 1.445(8) |
|                                                     |          | C17-C18             | 1.409(7) | C17-C18                                                                         | 1.423(8) |
|                                                     |          | C19-C20             | 1.435(7) | C19-C20                                                                         | 1.423(8) |
|                                                     |          | C21-C22             | 1.424(7) | C21-C22                                                                         | 1.439(8) |
|                                                     |          | C23-C24             | 1.424(7) | C23-C24                                                                         | 1.422(8) |
| average                                             | 1.438    | average             | 1.425    | average                                                                         | 1.430    |
| C-C (uncoordinated C=C)                             |          |                     |          |                                                                                 |          |
| C9-C10                                              | 1.378(4) | C25-C26             | 1.373(8) | C25-C26                                                                         | 1.384(8) |
|                                                     |          | C27-C28             | 1.380(8) | C27-C28                                                                         | 1.384(8) |
|                                                     |          | C29-C30             | 1.374(8) | C29-C30                                                                         | 1.390(8) |
| average                                             | 1.378    | average             | 1.376    | average                                                                         | 1.386    |
| Symmetry codes                                      |          |                     |          |                                                                                 |          |
| #1: $-1/3+y, 1/3-x+y, 4/3-z$<br>#2: $+y-x, 1-x, +z$ |          | #1: $1-x, 1-y, 1-z$ |          | #1: $1-x, 1-y, 1-z$<br>#2: $1/2+x, 3/2-y, -1/2+z$<br>#3: $3/2-x, -1/2+y, 3/2-z$ |          |

**Table S5** Comparison of the selected bond angles (°) in the complexes **3** and **4**.

| Bond angles (°) |            |               |            |               |            |
|-----------------|------------|---------------|------------|---------------|------------|
| 1               |            | 2             |            | 3             |            |
| O1-Cu1-O6       | 90.99(11)  | O1-Cu1-O6     | 93.14(17)  | O1-Cu1-O6     | 94.30(19)  |
| O1-Cu1-O9#1     | 90.55(9)   | O1-Cu1-O21    | 95.05(17)  | O1-Cu1-O21    | 95.50(18)  |
| O1-Cu1-C1       | 113.87(11) | O1-Cu1-C1#1   | 152.70(13) | O1-Cu1-C1#1   | 153.67(12) |
| O1-Cu1-C2       | 155.00(11) | O1-Cu1-C2#1   | 111.80(12) | O1-Cu1-C2#1   | 113.06(12) |
| O6-Cu1-O9#1     | 93.09(9)   | O6-Cu1-O21    | 88.33(16)  | O6-Cu1-O21    | 87.85(17)  |
| O6-Cu1-C1       | 152.67(11) | O6-Cu1-C1#1   | 113.20(12) | O6-Cu1-C1#1   | 111.27(12) |
| O6-Cu1-C2       | 111.60(11) | O6-Cu1-C2#1   | 154.60(15) | O6-Cu1-C2#1   | 152.57(2)  |
| C1-Cu1-O9#1     | 97.62(9)   | C1#1-Cu1-O2#1 | 92.81(19)  | C1#1-Cu1-O2#1 | 92.25(2)   |
| C1-Cu1-C2       | 41.99(10)  | C1#1-Cu1-C2#1 | 41.41(13)  | C2#1-Cu1-O2#1 | 92.88(19)  |
| C2-Cu1-O9#1     | 98.45(9)   | C2#1-Cu1-O21  | 94.05(18)  | C2#1-Cu1-C1#1 | 41.36(2)   |
| O2-Cu2-O3       | 90.25(11)  | O2-Cu2-O3     | 95.15(17)  | O2-Cu2-O3     | 96.87(19)  |
| O2-Cu2-O7       | 91.41(9)   | O2-Cu2-O7     | 91.61(16)  | O2-Cu2-O7     | 88.99(18)  |
| O2-Cu2-C3#2     | 113.22(11) | O2-Cu2-C3     | 112.82(12) | O2-Cu2-C3     | 110.87(2)  |
| O2-Cu2-C4#2     | 153.95(10) | O2-Cu2-C4     | 153.51(11) | O2-Cu2-C4     | 152.45(2)  |
| O3-Cu2-O7       | 91.12(9)   | O3-Cu2-O7     | 91.64(15)  | O3-Cu2-O7     | 91.42(17)  |
| O3-Cu2-C3#2     | 151.60(10) | O3-Cu2-C3     | 151.53(12) | O3-Cu2-C3     | 152.04(2)  |
| O3-Cu2-C4#2     | 112.19(10) | O3-Cu2-C4     | 110.31(12) | O3-Cu2-C4     | 110.25(2)  |
| C3#2-Cu2-O7     | 103.47(9)  | C3-Cu2-O7     | 93.21(18)  | C3-Cu2-O7     | 93.21(19)  |
| C3#2-Cu2-C42    | 41.66(10)  | C3-Cu2-C4     | 41.22(13)  | C3-Cu2-C4     | 41.88(12)  |
| C4#2-Cu2-O7     | 100.81(9)  | C4-Cu2-O7     | 94.76(18)  | C4-Cu2-O7     | 95.24(12)  |
| O4-Cu3-O5       | 90.90(11)  | O4-Cu3-O25    | 86.87(15)  | O4-Cu3-O25    | 87.08(17)  |
| O4-Cu3-O9       | 91.80(9)   | O4-Cu3-C5     | 110.59(19) | O4-Cu3-C5#1   | 109.53(2)  |
| O4-Cu3-C5       | 113.42(11) | O4-Cu3-C6     | 151.32(19) | O4-Cu3-C6#1   | 150.75(2)  |
| O4-Cu3-C6       | 154.51(11) | O5-Cu3-O4     | 95.06(16)  | O5-Cu3-O4     | 94.01(19)  |
| O5-Cu3-O9       | 89.06(9)   | O5-Cu3-O25    | 88.45(15)  | O5-Cu3-O25    | 89.88(17)  |
| O5-Cu3-C5       | 152.99(11) | O5-Cu3-C5     | 153.81(12) | O5-Cu3-C5#1   | 155.21(2)  |
| O5-Cu3-C6       | 112.01(11) | O5-Cu3-C6     | 113.12(19) | O5-Cu3-C6#1   | 114.67(2)  |
| C5-Cu3-O9       | 101.16(9)  | C5-Cu3-O25    | 98.08(18)  | C5#1-Cu3-O25  | 98.96(2)   |
| C5-Cu3-C6       | 42.00(10)  | C5-Cu3-C6     | 40.90(12)  | C5#1-Cu3-C6#1 | 41.38(2)   |
| C6-Cu3-O9       | 99.31(9)   | C6-Cu3-O25    | 98.62(19)  | C6#1-Cu3-O25  | 98.47(12)  |
| O11-Cu4-O7#3    | 85.95(9)   | O9-Cu4-O7     | 87.99(16)  | O9-Cu4-O7     | 87.29(19)  |

|                |            |                 |            |                 |           |
|----------------|------------|-----------------|------------|-----------------|-----------|
| O11-Cu4-O12#2  | 95.32(11)  | O9-Cu4-O14      | 97.81(17)  | O9-Cu4-O14      | 94.83(12) |
| O11-Cu4-C7     | 112.80(11) | O9-Cu4-C7       | 151.94(19) | O9-Cu4-C7       | 155.05(2) |
| O11-Cu4-C8     | 153.61(11) | O9-Cu4-C8       | 110.17(19) | O9-Cu4-C8       | 113.79(2) |
| O12#2-Cu4-O7#3 | 94.17(9)   | O14-Cu4-O7      | 94.54(15)  | O14-Cu4-O7      | 96.56(17) |
| O12#2-Cu4-C7   | 150.32(11) | O14-Cu4-C7      | 109.68(19) | O14-Cu4-C7      | 109.27(2) |
| O12#2-Cu4-C8   | 108.97(11) | O14-Cu4-C8      | 151.11(19) | O14-Cu4-C8      | 150.07(2) |
| C7-Cu4-O7#3    | 96.99(9)   | C7-Cu4-O7       | 95.18(18)  | C7-Cu4-O7       | 96.77(2)  |
| C8-Cu4-O7#3    | 101.94(9)  | C8-Cu4-O7       | 93.52(19)  | C7-Cu4-C8       | 41.55(2)  |
| C8-Cu4-C7      | 41.72(10)  | C8-Cu4-C7       | 41.91(12)  | C8-Cu4-O7       | 93.91(2)  |
|                |            | O10-Cu5-O37#1   | 82.81(16)  | O10-Cu5-O35#1   | 79.45(2)  |
|                |            | O10-Cu5-C9      | 109.31(13) | O10-Cu5-C9      | 113.35(2) |
|                |            | O10-Cu5-C10     | 150.41(12) | O10-Cu5-C10     | 152.04(2) |
|                |            | O11-Cu5-O10     | 100.19(17) | O11-Cu5-O10     | 95.04(2)  |
|                |            | O11-Cu5-O37#1   | 88.35(16)  | O11-Cu5-O35#1   | 98.78(2)  |
|                |            | O11-Cu5-C9      | 150.10(2)  | O11-Cu5-C9      | 150.23(2) |
|                |            | O11-Cu5-C10     | 108.80(2)  | O11-Cu5-C10     | 109.24(2) |
|                |            | C9-Cu5-O37#1    | 99.78(18)  | C9-Cu5-O35#1    | 95.65(2)  |
|                |            | C9-Cu5-C10      | 41.40(2)   | C9-Cu5-C10      | 41.17(2)  |
|                |            | C10-Cu5-O37#1   | 103.74(18) | C10-Cu5-O35#1   | 109.46(2) |
|                |            | O12-Cu6-O24     | 90.47(15)  | O12-Cu6-O13     | 95.26(19) |
|                |            | O12-Cu6-C11#1   | 112.18(19) | O12-Cu6-O24     | 92.69(17) |
|                |            | O12-Cu6-C12#1   | 153.37(19) | O12-Cu6-C11     | 114.17(2) |
|                |            | O13-Cu6-O12     | 97.17(17)  | O12-Cu6-C12     | 155.75(2) |
|                |            | O13-Cu6-O24     | 87.59(15)  | O13-Cu6-O24     | 85.89(17) |
|                |            | O13-Cu6-C11#1   | 150.32(12) | O13-Cu6-C11     | 150.46(2) |
|                |            | O13-Cu6-C12#1   | 108.80(19) | O13-Cu6-C12     | 108.44(2) |
|                |            | C11#1-Cu6-O24   | 96.53(17)  | C11-Cu6-O24     | 95.53(2)  |
|                |            | C11#1-Cu6-C12#1 | 41.50(2)   | C11-Cu6-C12     | 42.17(2)  |
|                |            | C12#1-Cu6-O24   | 96.30(19)  | C12-Cu6-O24     | 94.63(2)  |
|                |            | O15#1-Cu7-O21#1 | 93.49(15)  | O15#1-Cu7-O21#1 | 91.82(16) |
|                |            | O15#1-Cu7-C13   | 150.22(12) | O15#1-Cu7-C13#1 | 150.67(2) |
|                |            | O15#1-Cu7-C14   | 108.71(12) | O15#1-Cu7-C14#1 | 109.59(2) |
|                |            | O20-Cu7-O15#1   | 96.95(17)  | O20-Cu7-O15#1   | 97.59(19) |
|                |            | O20-Cu7-O21#1   | 87.87(16)  | O20-Cu7-O21#1   | 88.85(17) |
|                |            | O20-Cu7-C13     | 112.41(13) | O20-Cu7-C13#1   | 111.35(2) |

|  |  |                   |            |                  |            |
|--|--|-------------------|------------|------------------|------------|
|  |  | O20-Cu7-C14       | 154.14(12) | O20-Cu7-C14#1    | 152.5(2)   |
|  |  | C13-Cu7-O21#1     | 92.13(18)  | C13#1-Cu7-O21#1  | 93.97(19)  |
|  |  | C14-Cu7-O21#1     | 94.35(18)  | C14#1-Cu7-O21#1  | 94.56(2)   |
|  |  | C14-Cu7-C13       | 41.73(12)  | C14#1-Cu7-C13#1  | 41.38(2)   |
|  |  | O16-Cu8-O17#1     | 91.84(13)  | O16-Cu8-O31#1    | 88.33(2)   |
|  |  | O16-Cu8-O31A#1    | 93.41(12)  | O16-Cu8-C15      | 108.25(2)  |
|  |  | O16-Cu8-O31B#1    | 88.40(13)  | O16-Cu8-C16      | 149.94(2)  |
|  |  | O16-Cu8-C15       | 104.64(19) | O17-Cu8-O16      | 92.93(3)   |
|  |  | O16-Cu8-C16       | 145.81(19) | O17-Cu8-O31#1    | 84.97(2)   |
|  |  | O17#1-Cu8-O31A#1  | 95.70(14)  | O17-Cu8-C15      | 154.67(2)  |
|  |  | O17#1-Cu8-C16     | 117.11(12) | O17-Cu8-C16      | 115.02(2)  |
|  |  | O31B#1-Cu8-O17#1  | 81.61(14)  | C15-Cu8-O31#1    | 109.02(2)  |
|  |  | O31B#1-Cu8-O31A#1 | 15.10(15)  | C15-Cu8-C16      | 42.02(2)   |
|  |  | O31B#1-Cu8-C15    | 125.91(14) | C16-Cu8-O31#1    | 104.72(2)  |
|  |  | O31B#1-Cu8-C16    | 112.35(14) | O18-Cu9-O19#1    | 95.39(2)   |
|  |  | C15-Cu8-O17#1     | 147.54(12) | O18-Cu9-O241#    | 92.16(18)  |
|  |  | C15-Cu8-O31A#1    | 110.83(14) | O18-Cu9-C17#1    | 118.67(2)  |
|  |  | C15-Cu8-C16       | 41.26(12)  | O18-Cu9-C18#1    | 157.76(2)  |
|  |  | C16-Cu8-O31A#1    | 100.98(14) | O19#1-Cu9-O24#1  | 93.22(16)  |
|  |  | O18-Cu9-O19       | 94.66(19)  | O19#1-Cu9-C17#1  | 145.17(2)  |
|  |  | O18-Cu9-O24       | 88.46(16)  | O19#1-Cu9-C18#1  | 104.40(2)  |
|  |  | O18-Cu9-C17#1     | 116.24(12) | C17#1-Cu9-O24#1  | 93.84(18)  |
|  |  | O18-Cu9-C18#1     | 156.57(13) | C18#1-Cu9-O24#1  | 97.17(19)  |
|  |  | O19-Cu9-O24       | 92.38(15)  | C18#1-Cu9-C17#1  | 40.80(2)   |
|  |  | O19-Cu9-C17#1     | 147.89(19) | S4#1-Cu10-O25#1  | 77.54(11)  |
|  |  | C17#1-Cu9-O24     | 96.97(18)  | O24#1-Cu10-S41#  | 79.60(11)  |
|  |  | C18#1-Cu9-O19     | 107.23(12) | O24#1-Cu10-O25#1 | 156.75(15) |
|  |  | C18#1-Cu9-O24     | 98.85(18)  | O33-Cu10-S41#    | 99.12(14)  |
|  |  | C18#1-Cu9-C17#1   | 41.07(12)  | O33-Cu10-O24#1   | 94.22(18)  |
|  |  | S4-Cu10-O24       | 78.02(10)  | O33-Cu10-O25#1   | 85.34(17)  |
|  |  | S4-Cu10-O25       | 78.31(10)  | O33-Cu10-C20     | 145.46(2)  |
|  |  | O25-Cu10-O24      | 156.15(13) | C19-Cu10-S4#1    | 156.10(19) |
|  |  | O33-Cu10-S4       | 97.08(13)  | C19-Cu10-O24#1   | 97.67(19)  |
|  |  | O33-Cu10-O24      | 93.18(15)  | C19-Cu10-O25#1   | 104.94(2)  |
|  |  | O33-Cu10-O25      | 86.88(15)  | C19-Cu10-O33     | 104.84(2)  |

|  |  |                  |            |                  |            |
|--|--|------------------|------------|------------------|------------|
|  |  | O33-Cu10-C20     | 147.00(19) | C19-Cu10-C20     | 40.96(2)   |
|  |  | C19-Cu10-S4      | 157.41(17) | C20-Cu10-S4#1    | 115.30(16) |
|  |  | C19-Cu10-O24     | 98.69(18)  | C20-Cu10-O24#1   | 94.82(19)  |
|  |  | C19-Cu10-O25     | 104.28(18) | C20-Cu10-O25#1   | 98.65(19)  |
|  |  | C19-Cu10-O33     | 105.53(12) | O27#1-Cu11-O25#1 | 86.19(16)  |
|  |  | C19-Cu10-C20     | 41.76(12)  | O27#1-Cu11-C21   | 146.17(12) |
|  |  | C20-Cu10-S4      | 115.87(15) | O34-Cu11-O25#1   | 87.99(18)  |
|  |  | C20-Cu10-O24     | 95.32(18)  | O34-Cu11-O27#1   | 106.17(12) |
|  |  | C20-Cu10-O25     | 97.54(17)  | O34-Cu11-C21     | 107.27(13) |
|  |  | O27-Cu11-C21#1   | 148.21(12) | O34-Cu11-C22     | 148.68(16) |
|  |  | O34-Cu11-O27     | 102.64(16) | C21-Cu11-O25#1   | 100.77(19) |
|  |  | O34-Cu11-C21#1   | 108.87(19) | C22-Cu11-O25#1   | 99.31(19)  |
|  |  | O34-Cu11-C22#1   | 149.97(2)  | C22-Cu11-O27#1   | 104.89(14) |
|  |  | C22#1-Cu11-O27   | 107.45(2)  | C22-Cu11-C21     | 41.50(16)  |
|  |  | C22#1-Cu11-C21#1 | 41.23(2)   | O28-Cu12-O29     | 96.94(14)  |
|  |  | O28-Cu12-O29A    | 109.27(6)  | O28-Cu12-O35     | 92.74(12)  |
|  |  | O28-Cu12-O29B    | 99.98(6)   | O28-Cu12-C23#1   | 112.44(14) |
|  |  | O28-Cu12-O37     | 85.95(16)  | O28-Cu12-C24#1   | 153.18(12) |
|  |  | O28-Cu12-C23#1   | 108.24(2)  | O29-Cu12-O35     | 115.76(13) |
|  |  | O28-Cu12-C24#1   | 150.21(12) | C23#1-Cu12-O29   | 121.36(15) |
|  |  | O29A-Cu12-O37    | 96.28(5)   | C23#1-Cu12-O35   | 112.69(13) |
|  |  | O29A-Cu12-C24#1  | 99.07(6)   | C23#1-Cu12-C24#1 | 40.76(18)  |
|  |  | O29B-Cu12-O37    | 87.76(4)   | C24#1-Cu12-O29   | 99.17(14)  |
|  |  | C23#1-Cu12-O29B  | 149.57(6)  | C24#1-Cu12-O35   | 99.67(13)  |
|  |  | C23#1-Cu12-O37   | 105.55(12) | S2-Cu13-O3       | 84.73(12)  |
|  |  | C23#1-Cu12-C24#1 | 42.05(12)  | S2-Cu13-O14      | 85.64(12)  |
|  |  | C24#1-Cu12-O29B  | 109.23(6)  | O8-Cu13-S2       | 163.42(15) |
|  |  | C24#1-Cu12-O37   | 100.99(19) | O8-Cu13-O3       | 98.91(18)  |
|  |  | S2-Cu13-O14      | 85.97(11)  | O8-Cu13-O14      | 110.91(18) |
|  |  | O8-Cu13-S2       | 164.95(13) | O14-Cu13-O3      | 79.60(16)  |
|  |  | O8-Cu13-O14      | 109.05(16) | S3-Cu14-Cu15#2   | 95.88(6)   |
|  |  | S3-Cu14-O19      | 85.49(11)  | S3-Cu14-O19      | 85.74(11)  |
|  |  | O23-Cu14-S3      | 162.97(14) | O19-Cu14-Cu15#2  | 139.36(12) |
|  |  | O23-Cu14-O19     | 111.53(17) | O23-Cu14-Cu15#2  | 71.95(14)  |
|  |  | S5-Cu15-O27      | 88.61(11)  | O23-Cu14-S3      | 162.88(16) |



|                                                 |                   |                                                                              |            |                 |            |
|-------------------------------------------------|-------------------|------------------------------------------------------------------------------|------------|-----------------|------------|
|                                                 |                   | O26-Cu15-S5                                                                  | 157.88(13) | O23-Cu14-O19    | 89.36(18)  |
|                                                 |                   | O26-Cu15-O27                                                                 | 113.37(16) | S5-Cu15-Cu14#3  | 84.50(5)   |
|                                                 |                   | S1-Cu16-O15                                                                  | 86.81(11)  | S5-Cu15-O27     | 86.45(12)  |
|                                                 |                   | O22-Cu16-S1                                                                  | 160.12(14) | O26-Cu15-Cu14#3 | 92.92(14)  |
|                                                 |                   | O22-Cu16-O15                                                                 | 112.42(16) | O26-Cu15-S5     | 160.79(14) |
|                                                 |                   | S7-Cu17-S6A                                                                  | 114.76(3)  | O26-Cu15-O27    | 111.97(17) |
|                                                 |                   | S7-Cu17-S6B                                                                  | 110.87(3)  | O27-Cu15-Cu14#3 | 112.43(12) |
|                                                 |                   | S7-Cu17-O34                                                                  | 77.63(11)  | S1-Cu16-S6#4    | 109.63(8)  |
|                                                 |                   | O30A-Cu17-S6A                                                                | 82.47(8)   | S1-Cu16-O15     | 85.38(12)  |
|                                                 |                   | O30A-Cu17-S7                                                                 | 162.95(8)  | O15-Cu16-S6#4   | 105.67(13) |
|                                                 |                   | O30A-Cu17-O32A                                                               | 89.25(15)  | O22-Cu16-S1     | 144.90(14) |
|                                                 |                   | O30A-Cu17-O34                                                                | 85.53(8)   | O22-Cu16-S6#4   | 99.08(15)  |
|                                                 |                   | O30A-Cu17-O35                                                                | 91.63(10)  | O22-Cu16-O15    | 106.28(17) |
|                                                 |                   | O30B-Cu17-S6B                                                                | 85.34(8)   |                 |            |
|                                                 |                   | O30B-Cu17-S7                                                                 | 163.47(7)  |                 |            |
|                                                 |                   | O30B-Cu17-O34                                                                | 87.97(7)   |                 |            |
|                                                 |                   | O32A-Cu17-S6A                                                                | 90.77(8)   |                 |            |
|                                                 |                   | O32A-Cu17-S7                                                                 | 91.28(9)   |                 |            |
|                                                 |                   | O32A-Cu17-O34                                                                | 81.81(9)   |                 |            |
|                                                 |                   | O32A-Cu17-O35                                                                | 171.33(8)  |                 |            |
|                                                 |                   | O32B-Cu17-S6B                                                                | 79.51(9)   |                 |            |
|                                                 |                   | O32B-Cu17-S7                                                                 | 100.34(9)  |                 |            |
|                                                 |                   | O32B-Cu17-O30B                                                               | 86.34(14)  |                 |            |
|                                                 |                   | O32B-Cu17-O34                                                                | 84.77(9)   |                 |            |
|                                                 |                   | O32B-Cu17-O35                                                                | 170.83(12) |                 |            |
|                                                 |                   | O34-Cu17-S6A                                                                 | 165.80(3)  |                 |            |
|                                                 |                   | O34-Cu17-S6B                                                                 | 163.17(3)  |                 |            |
|                                                 |                   | O35-Cu17-S6A                                                                 | 98.05(3)   |                 |            |
|                                                 |                   | O35-Cu17-S6B                                                                 | 105.35(3)  |                 |            |
|                                                 |                   | O35-Cu17-S7                                                                  | 85.49(15)  |                 |            |
|                                                 |                   | O35-Cu17-O30B                                                                | 86.36(9)   |                 |            |
|                                                 |                   | O35-Cu17-O34                                                                 | 89.64(18)  |                 |            |
| Symmetry codes                                  |                   |                                                                              |            |                 |            |
| #1: -1/3+y, 1/3-x+y, 4/3-z<br>#2: +y-x, 1-x, +z | #1: 1-x, 1-y, 1-z | #1: 1-x, 1-y, 1-z;<br>#2: 1/2+x, 3/2-y, -1/2+z;<br>#3: 3/2-x, -1/2+y, 3/2-z; |            |                 |            |

|                      |  |                            |
|----------------------|--|----------------------------|
| #3: $1-y, 1+x-y, +z$ |  | #4: $3/2-x, 1/2+y, 3/2-z;$ |
|----------------------|--|----------------------------|

## 2.2 Additional Structural Description

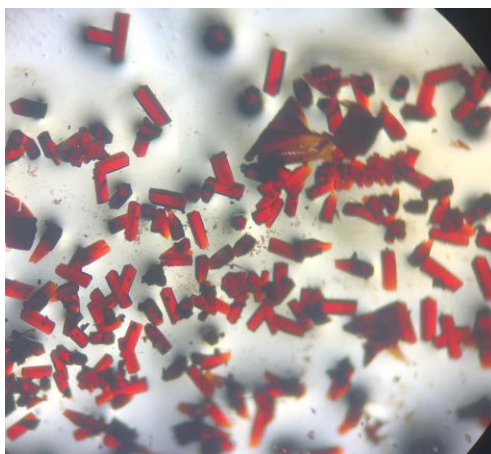

(a) Complex 1

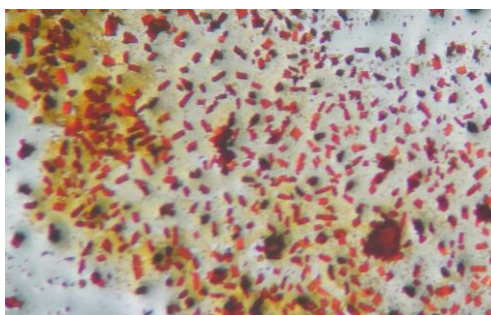

(b) Complex 2

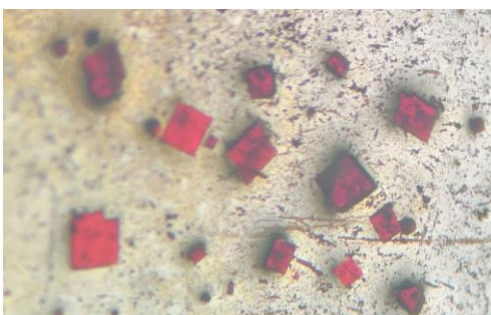

(c) Complex 3

**Fig. S1** Crystal images of these cuprofullerene complexes amplified 40 times under a microscope.

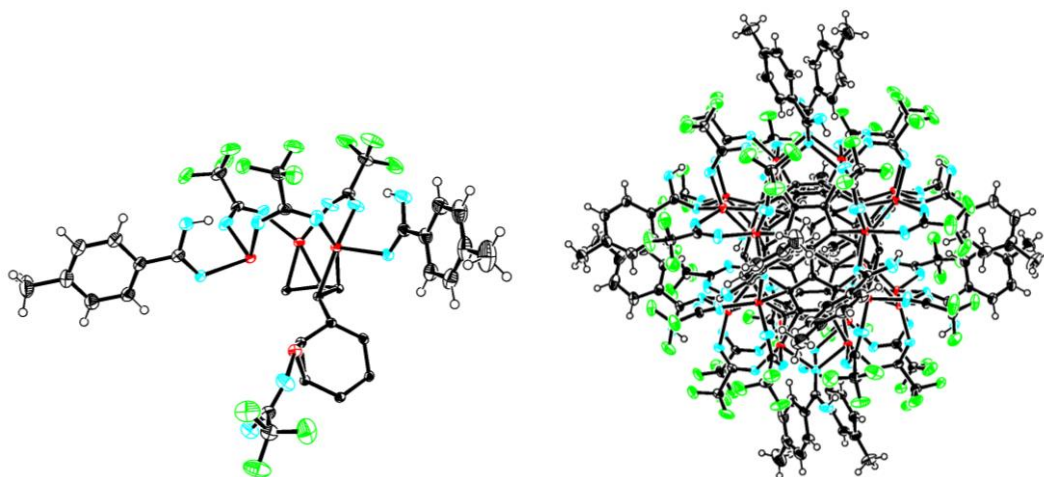

(a) Complex 1

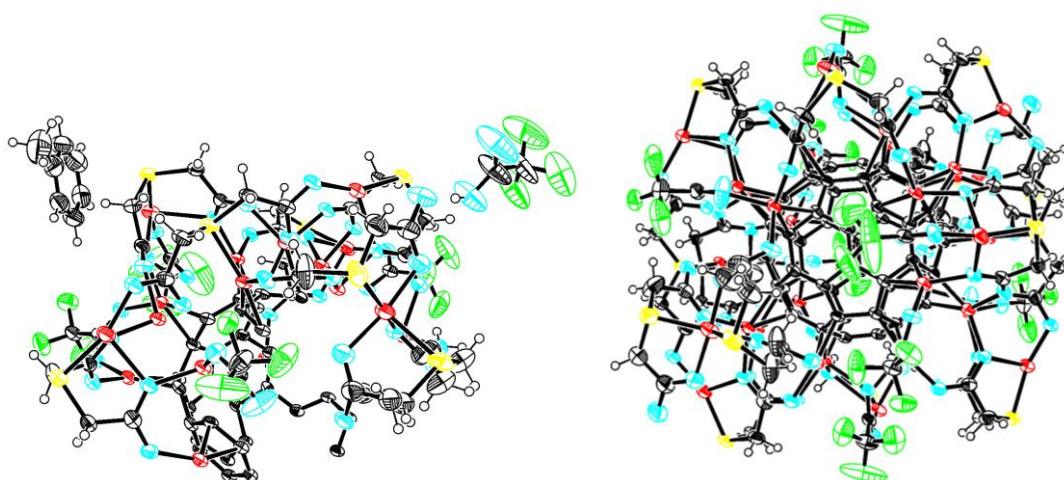

(a) Complex 2

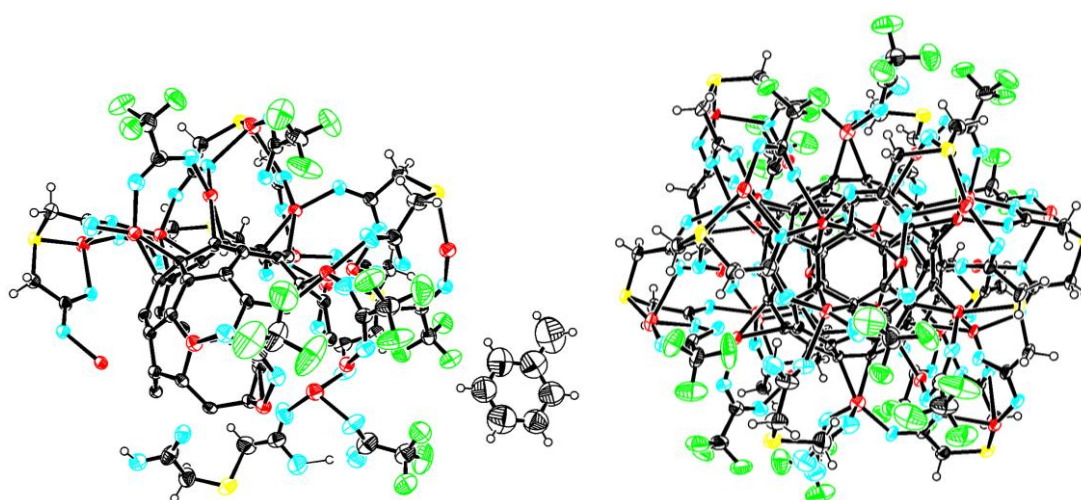

(a) Complex 3

**Fig. S2** Asymmetrical units (left) and molecular structures (right) of the complexes **1-3** with 50% thermal ellipsoid. (Color codes: red, Cu; cyan, O; yellow, S; black, C; green, F; white cycle, H.)

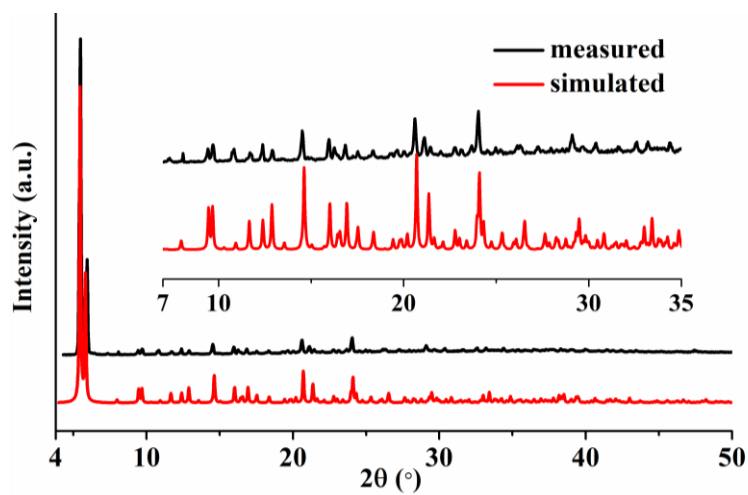

(a) Complex 1

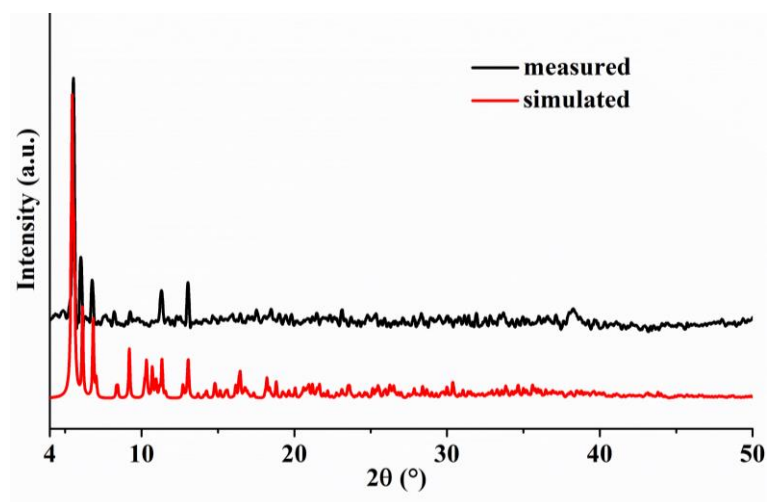

(a) Complex 2

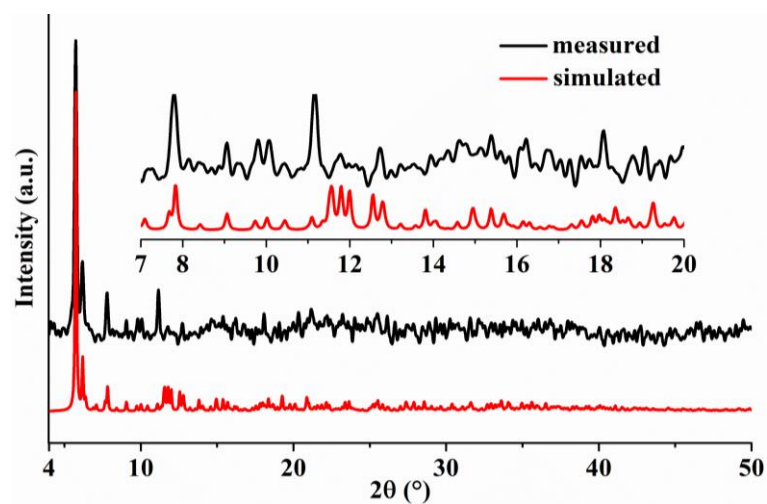

(a) Complex 3

**Fig. S3** Comparison of the simulated and measured X-ray powder diffraction patterns of the complexes 1, 2 and 3.



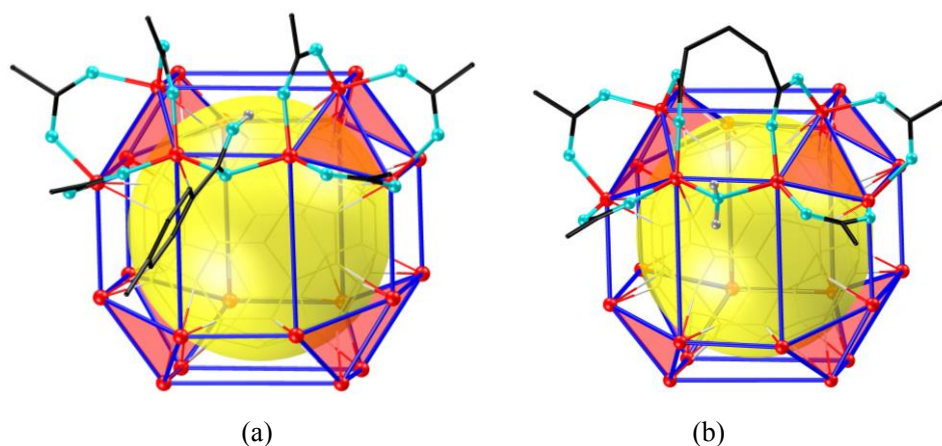

**Fig. S4** Comparison of the rhombicuboctahedral  $C_{60}@Cu^{I}_{24}$  core-shell cuprofullerene structures in complex **1** (a) and the reported cuprofullerene glutarate previously (b). Note that all F atoms are omitted and only one whole glutarate chain is shown for clarity in right figure. Color code: red, Cu; cyan, O; black, C; gray, H.

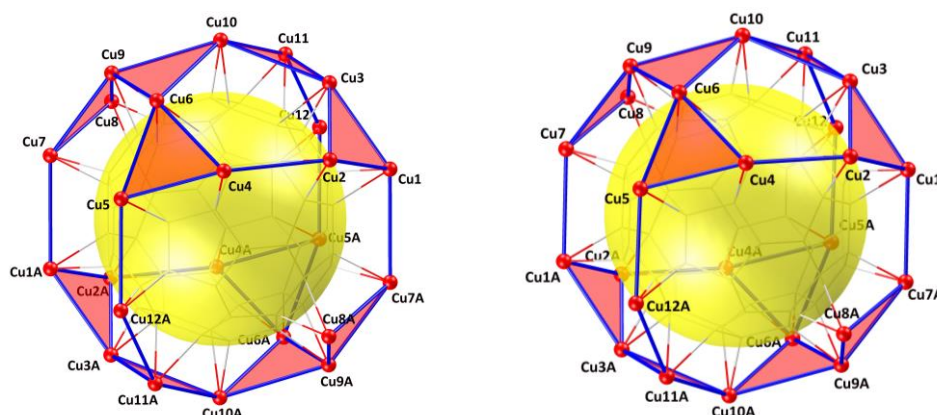

(a)  $C_{60}@Cu^{I}_{24}$  structures showing two group of penta- $Cu_3$  trigons canopying on  $C_{60}$  surface and two  $Cu_{10}$  big rings ( $Cu_{10}Cu_{11}Cu_{12}Cu_{5A}Cu_{6A}Cu_{10A}Cu_{11A}Cu_{12A}Cu_5Cu_6$  and  $Cu_{10}Cu_3Cu_1Cu_7ACu_9ACu_{10A}Cu_3ACu_1ACu_7Cu_9$ ) around the  $C_{60}$  ball.

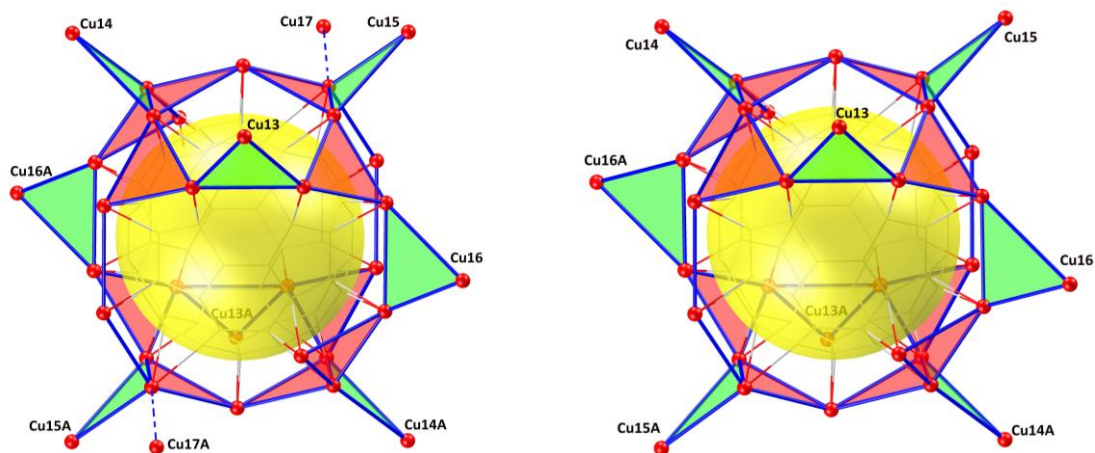

(b) triplet  $C_{60}@Cu^{I}_{24}@Cu^I_8$  core-shell structures showing the canopying (red) and standing (green)  $Cu_3$  trigons. The  $Cu(II)$  atoms ( $Cu_{17}$  and  $Cu_{17A}$ ) in the complex **2** are shown in left.

**Fig. S5** Comparison of the core-shell cuprofullerene structures in complexes **2** and **3**.

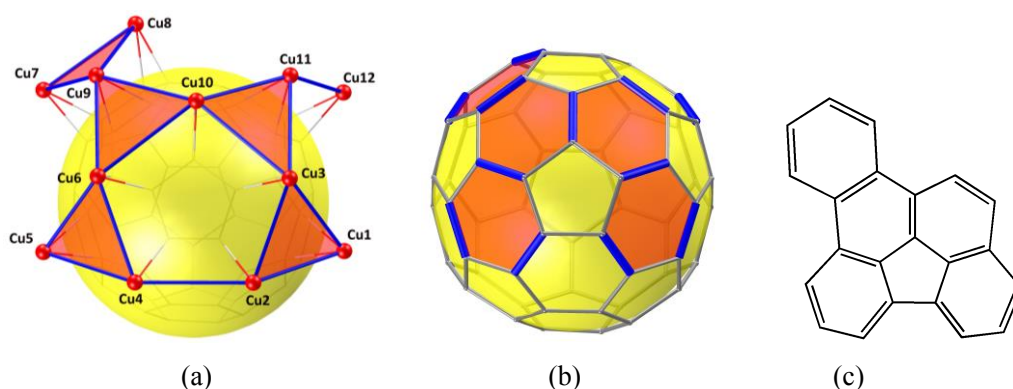

**Fig. S6** Penta-Cu<sub>3</sub> trigons (a) canoping on an indeno[1, 2, 3, 4-defg]chrysene (c) fragment of C<sub>60</sub> surface (b, c).

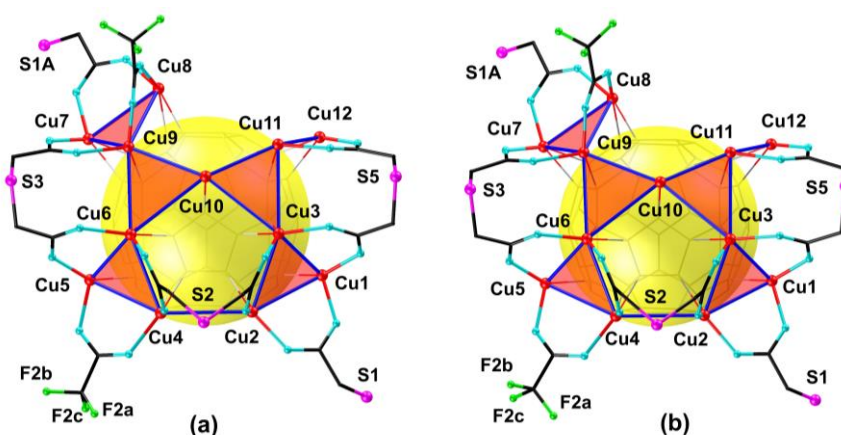

**Fig. S7** The outer three Cu<sub>3</sub> trigons supported by three ( $\mu_2\text{-}\kappa^1:\kappa^1$ )-carboxylates from **L<sub>S</sub>/L<sub>F</sub>** in complex **2** (a) and complex **3** (b), showing Cu<sub>1</sub>Cu<sub>2</sub>Cu<sub>3</sub> trigon is edge-bridged by three ( $\mu_2\text{-}\kappa^1:\kappa^1$ )-carboxylates from three **L<sub>S</sub>** (S<sub>1</sub>, S<sub>2</sub>, and S<sub>5</sub>), Cu<sub>4</sub>Cu<sub>5</sub>Cu<sub>6</sub> and Cu<sub>7</sub>Cu<sub>8</sub>Cu<sub>9</sub> trigons are by three ( $\mu_2\text{-}\kappa^1:\kappa^1$ )-carboxylates from two **L<sub>S</sub>** (S<sub>2</sub>, S<sub>3</sub>, and S<sub>3</sub>, S<sub>1A</sub>) and one **L<sub>F</sub>**, respectively.

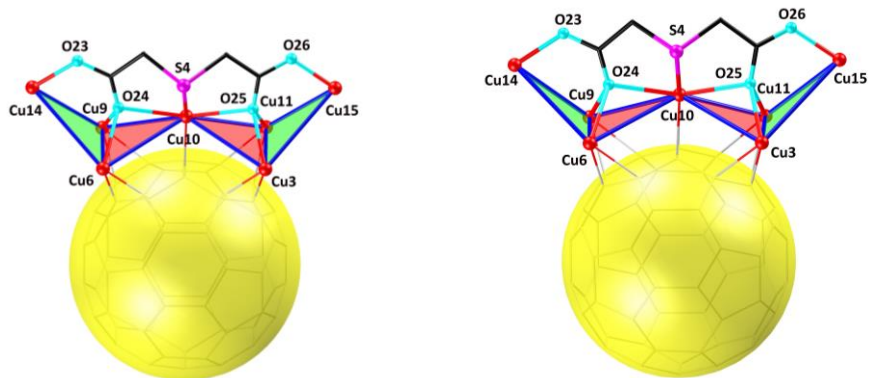

(a) similar local coordination environments of  $\mu_7\text{-L}_s(\text{S4})$  to support the canopying (red) and standing (green)  $\text{Cu}^{\text{I}}_3$  trigons.

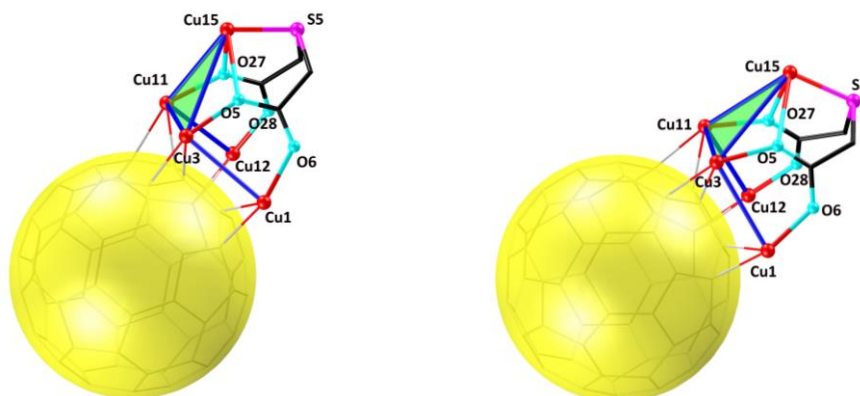

(b) similar local coordination environments of  $\mu_5\text{-L}_s(\text{S5})$  to support the standing  $\text{Cu}^{\text{I}}_3$  trigons (green).

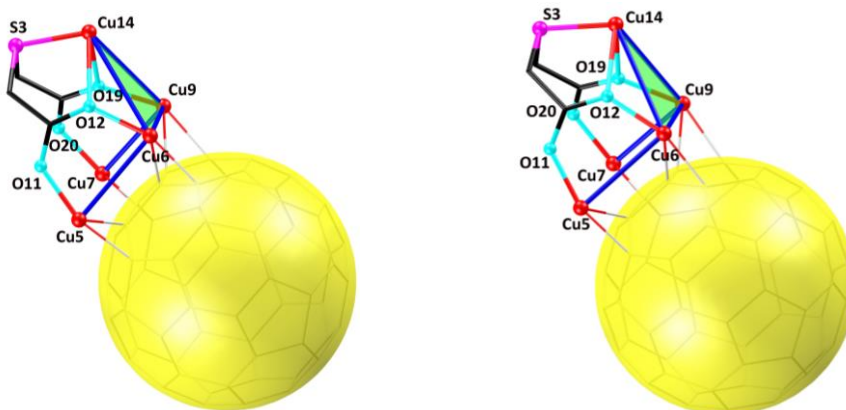

(c) similar local coordination environments of  $\mu_5\text{-L}_s(\text{S3})$  to support the standing  $\text{Cu}^{\text{I}}_3$  trigons (green).

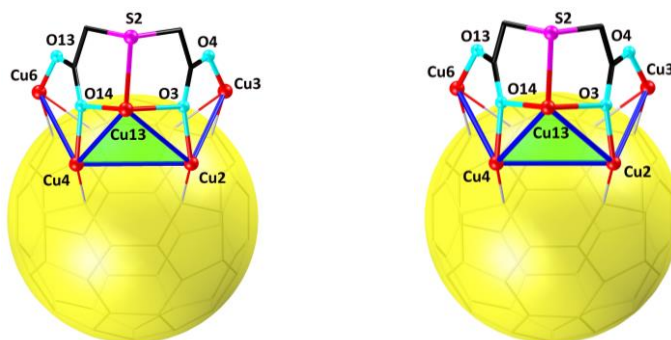

(d) similar local coordination environments of  $\mu_5\text{-L}_s(\text{S2})$  to support the standing  $\text{Cu}^{\text{I}}_3$  trigons (green).



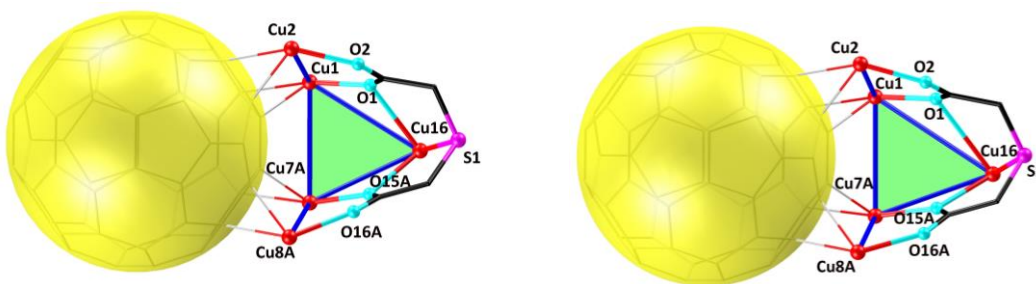

(e) similar local coordination environments of  $\mu_5\text{-L}_S(\text{S1})$  to support the standing  $\text{Cu}^{\text{I}}_3$  trigon (green) on  $\text{C}_{60}$  surface as a pillar.

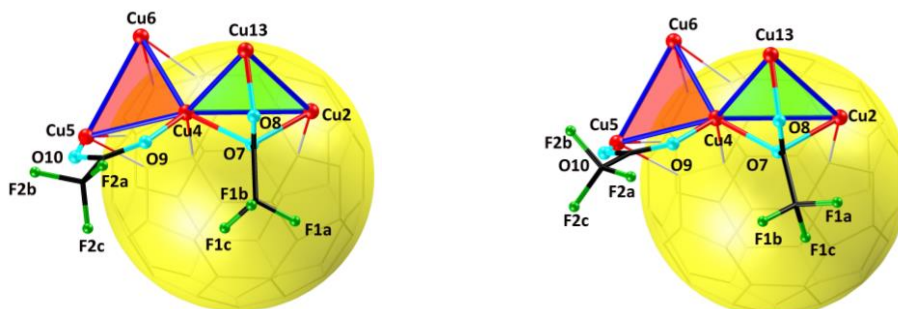

(f) similar local coordination environments of  $\mu_2\text{-(}\kappa^1\text{:}\kappa^1\text{)-L}_F(\text{F2})$  and  $\mu_3\text{-(}\kappa^1\text{:}\kappa^2\text{)-L}_F(\text{F1})$  to support the canopying (red) and standing (green)  $\text{Cu}^{\text{I}}_3$  trigons.

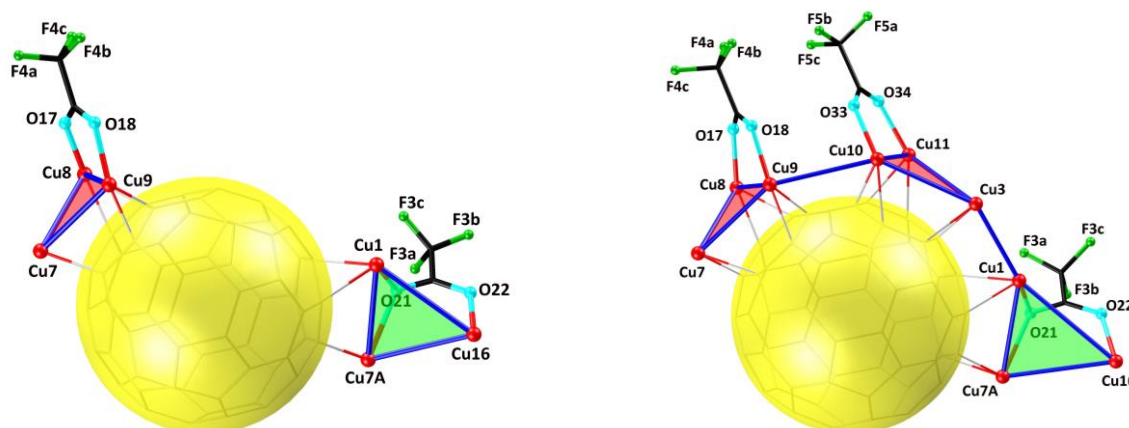

(g) local coordination environments of  $\mu_2\text{-(}\kappa^1\text{:}\kappa^1\text{)-L}_F(\text{F4})$ ,  $\mu_2\text{-(}\kappa^1\text{:}\kappa^1\text{)-L}_F(\text{F5})$  (right) and  $\mu_3\text{-(}\kappa^1\text{:}\kappa^2\text{)-L}_F(\text{F3})$  to support the canopying (red) and standing (green)  $\text{Cu}^{\text{I}}_3$  trigons.

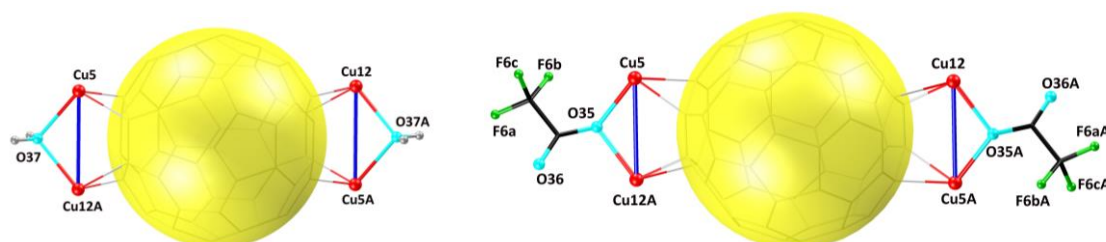

(h) local coordination environments of the pillar  $\text{Cu12Cu5A}$  and  $\text{Cu5Cu12A}$  bridged by  $\mu_2\text{-O}$  from  $\text{H}_2\text{O}$  (O37 and O37A, left) and  $\text{L}_F$  (O35 and O35A, right).

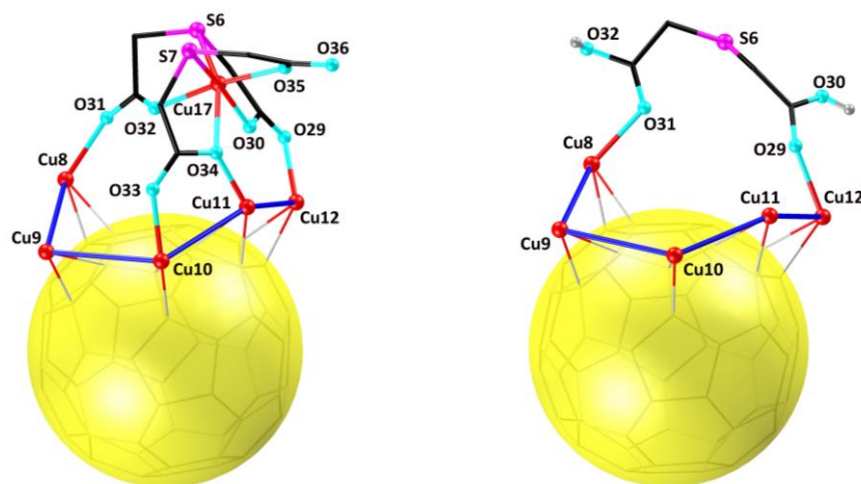

(i) local coordination environments of  $L_S$ (S6 and S7, left) and  $H_2L_S$  (S6, right) showing the differences between the complex **2** and **3**. Note that Cu17 is Cu(II) atom showing Jahn-Teller coordination geometry with S6-Cu17 and O34-Cu17 longer than others. O35-Cu17, 1.992(5) Å; O32-Cu17, 1.990(4)/1.910(3) Å; O30-Cu17, 1.860(3)/2.130(3) Å; S7-Cu17, 2.341(2) Å; S6-Cu17, 2.530(2) Å; O34-Cu17 2.352(4) Å.

**Fig. S8** Comparison of coordination environments and molecular structures between complexes **2** (left) and **3** (right) showing their similarities and differences.

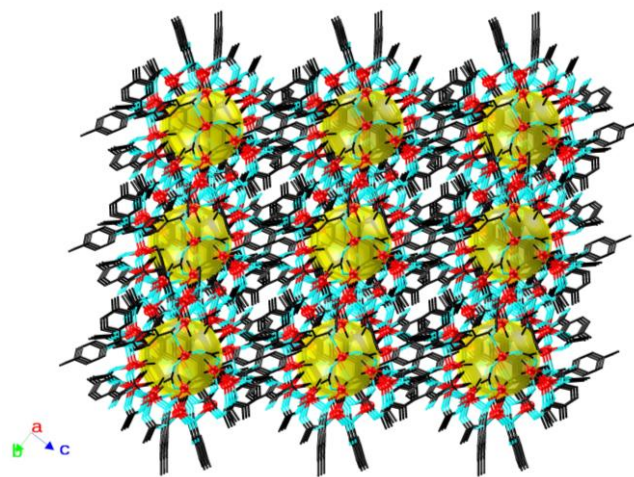

(a)

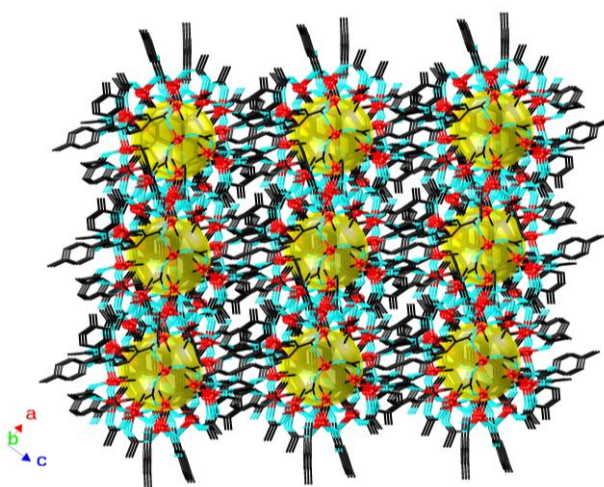

(b)

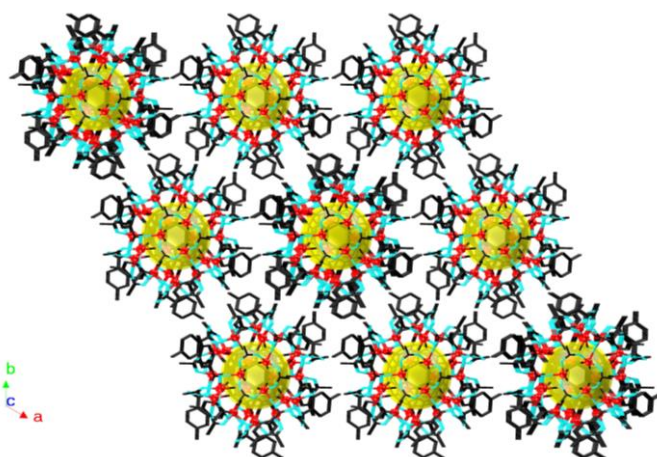

(c)

**Fig. S9** Packing structures of the complex **1** along *a* (a), *b* (b) and *c* (c) axis. (The crystallized solvent molecules, F atoms and H atoms are omitted for clarity. Color codes: red, Cu; cyan, O; black, C)



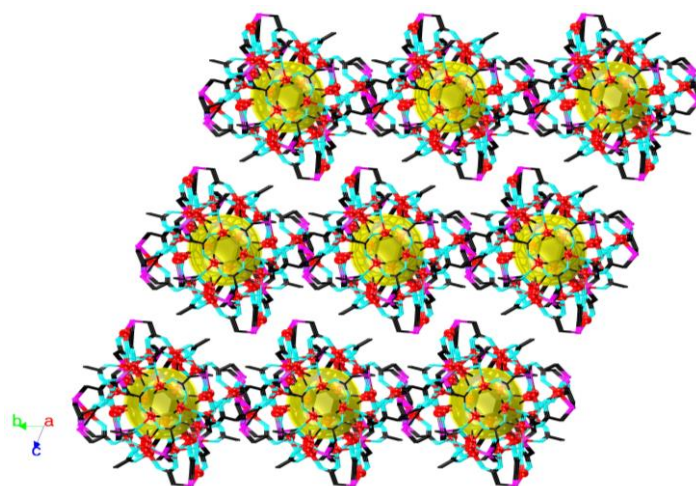

(a)

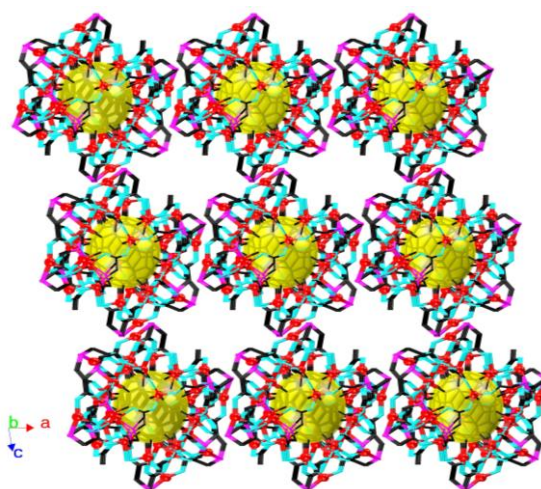

(b)

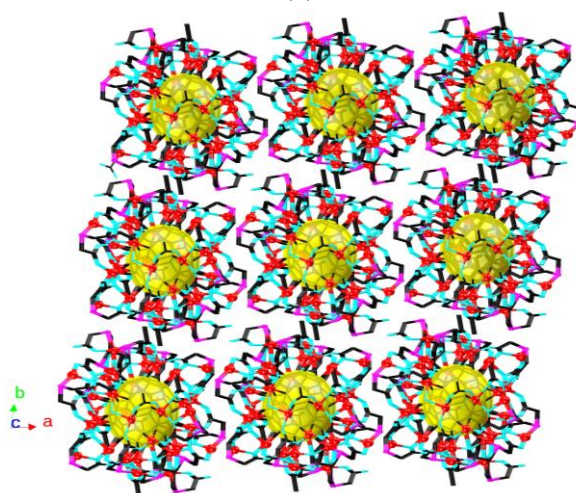

(c)

**Fig. S10** Packing structures of the complex **2** along *a* (a), *b* (b) and *c* (c) axis. (The crystallized solvent molecules, F atoms and H atoms are omitted for clarity. Color codes: red, Cu; cyan, O; pink, S; black, C)

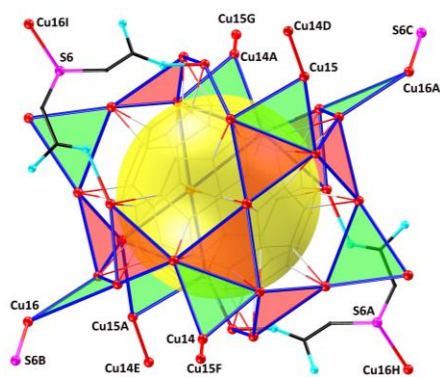

(a) 8-connected cuprofullerene unit through 4 Cu-Cu (Cu15-Cu14D, Cu14-Cu15F, Cu15A-Cu14E, Cu14A-Cu15G) and 4 Cu-S (S6-Cu16I, Cu16-S6B, S6A-Cu16H, Cu16A-S6C) interactions.  
 (symmetry codes: A  $-x, -y, -z$ ; B  $0.5-x, -0.5+y, -0.5-z$ ; C  $-0.5+x, 0.5-y, 0.5+z$ ; D  $-0.5-x, 0.5+y, -0.5-z$ ; E  $0.5+x, -0.5-y, 0.5+z$ ; F  $-0.5-x, -0.5+y, -0.5-z$ ; G  $0.5+x, 0.5-y, 0.5+z$ ; H  $-0.5+x, -0.5-y, 0.5+z$ ; I  $0.5-x, 0.5+y, -0.5-z$ )

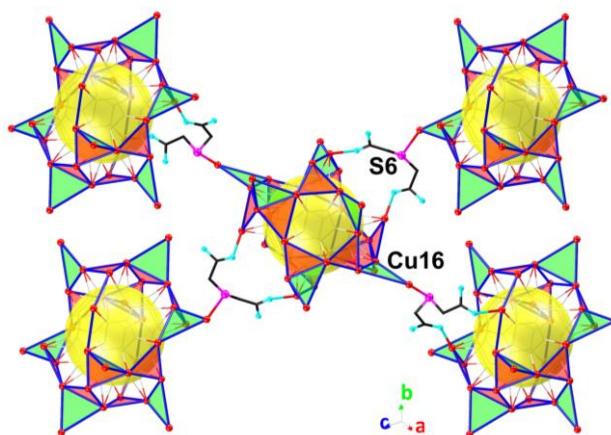

(b) intercuprofullerene Cu-S interactions showing a planar 4-connected sheet.

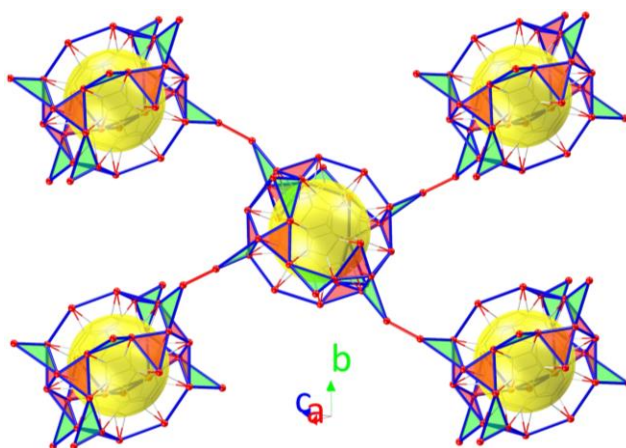

(c) intercuprofullerene Cu-Cu interactions showing a planar 4-connected sheet.

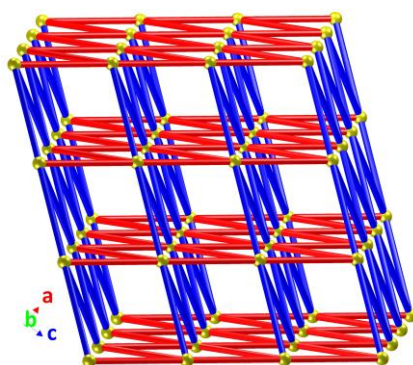

(d) simplified **bcu** (CsCl) topological network. Yellow ball represents the cuprofullerene molecule, red and blue bond represent Cu-Cu and Cu-S interactions, respectively.

**Fig. S11** Illustration of the 3-D structures of the complex **3** supported by intercuprofullerene Cu-Cu (red) and Cu-S (blue) interactions. (some atoms and fragments are omitted for clarity).

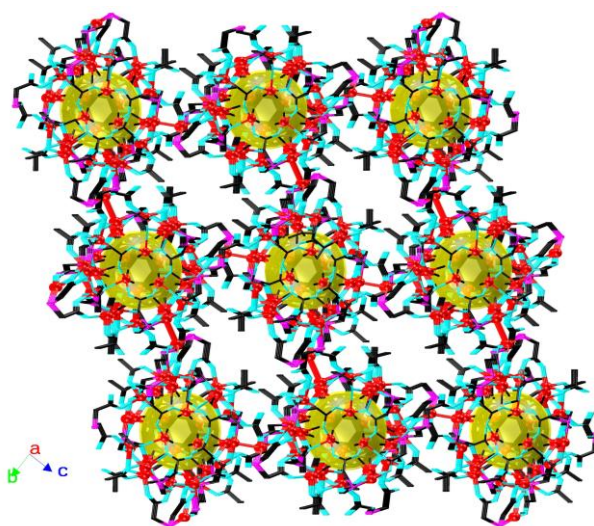

(a)

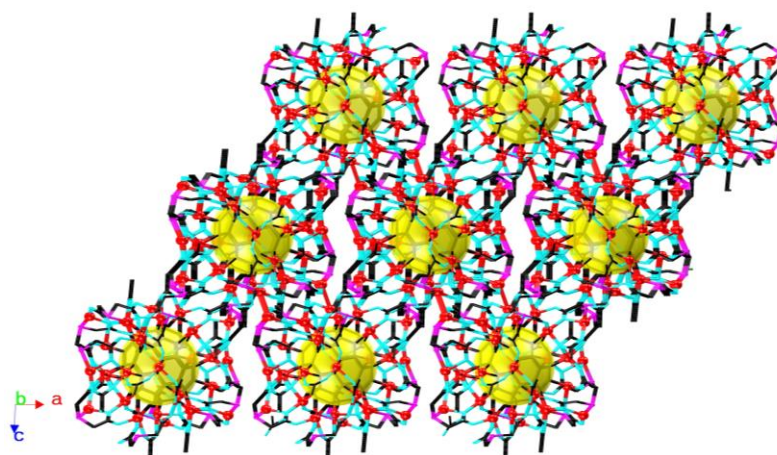

(b)



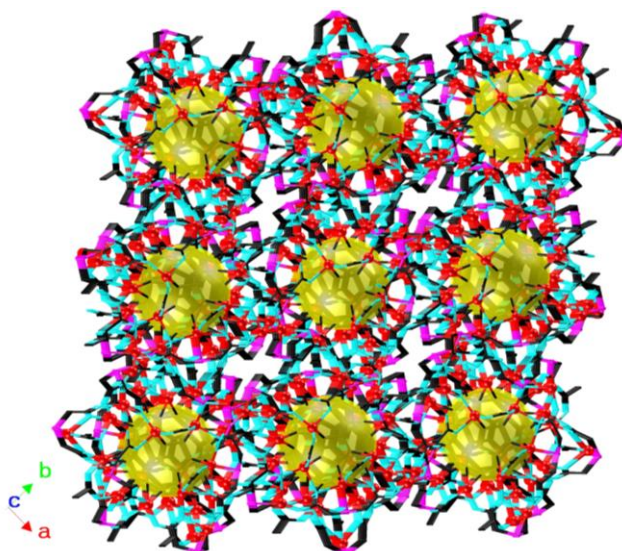

(c)

**Fig. S12** Packing structures of the complex **3** along *a* (*a*), *b* (*b*) and *c* (*c*) axis. (The crystallized solvent molecules, F atoms and H atoms are omitted for clarity. Color codes: red, Cu; cyan, O; pink, S; black, C)

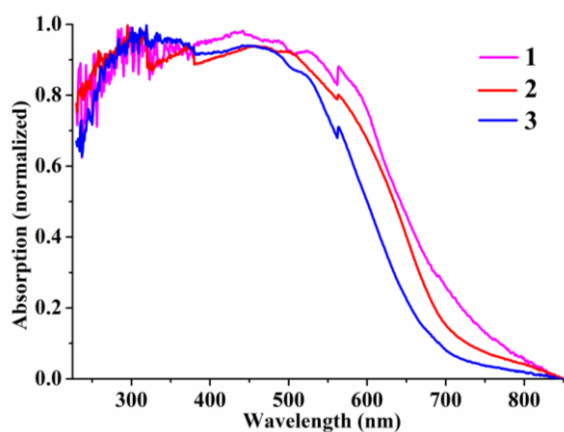

**Fig. S13** Comparison of the diffuse reflectance solid-state UV-Vis spectra of the complexes **1-3**.

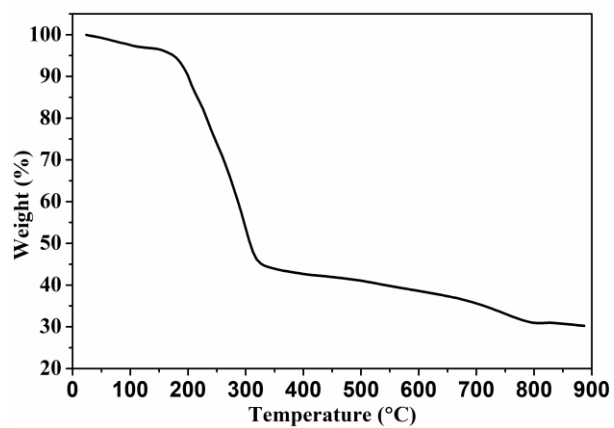

(a) Complex 1

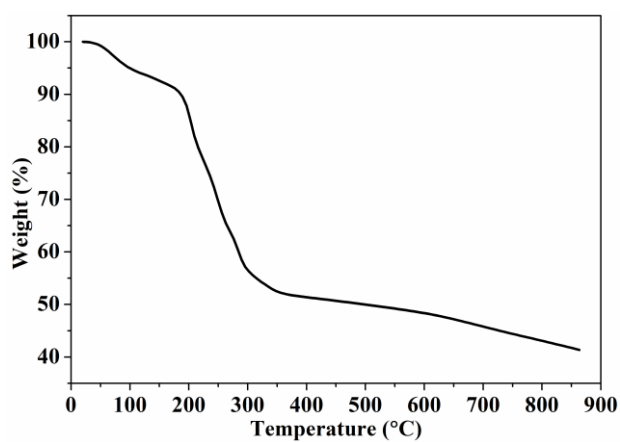

(b) Complex 2

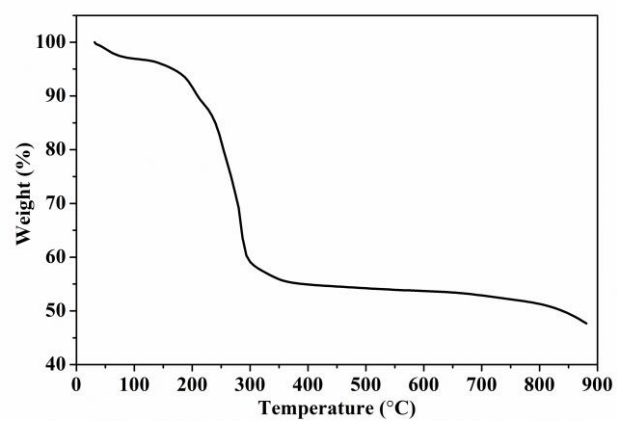

(c) Complex 3

**Fig. S14** Thermogravimetric analysis (TGA) plots of the complexes 1-3.



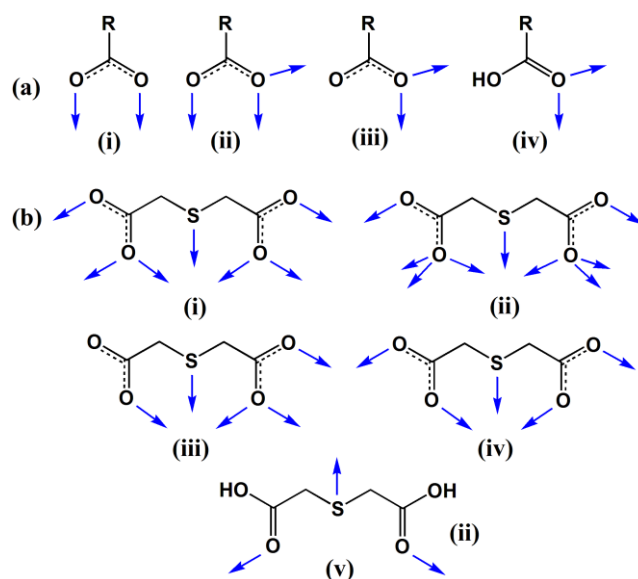

**Fig. S15** Coordination modes of  $L_F$ ,  $HL_{mb}$  (a) and  $L_S/H_2L_S$  (b) in this work. (a) (i)  $(\mu_2-\kappa^1:\kappa^1)\text{-COO}$ , (ii)  $(\mu_3-\kappa^1:\kappa^2)\text{-COO}$ , (iii)  $\mu_2(\text{O})\text{-COO}$ , (iv)  $\mu_2(\text{O})\text{-COOH}$  (b) (i)  $(\mu_5-\kappa^1_2(\text{O}):\kappa^2_2(\text{O}):\kappa^1(\text{S}))\text{-LS}$ , (ii)  $(\mu_7-\kappa^1_2(\text{O}):\kappa^3_2(\text{O}):\kappa^1(\text{S}))\text{-LS}$ , (iii)  $(\mu_3-\kappa^1(\text{O}):\kappa^2(\text{O}):\kappa^1(\text{S}))\text{-LS}$ , (iv)  $(\mu_3-\kappa^1_4(\text{O}):\kappa^1(\text{S}))\text{-LS}$ , (v)  $(\mu_3-\kappa^1_2(\text{O}):\kappa^1(\text{S}))\text{-H}_2\text{LS}$ .

### 3 References

- [1] G. M. Sheldrick, A short history of SHELX. *Acta Cryst.*, **2008**, *A64*: 112–122.
- [2] O. V. Dolomanov, L. J. Bourhis, R. J. Gildea, J. A. K. Howard, H. Puschmann. OLEX2: a complete structure solution, refinement and analysis program. *J. Appl. Cryst.*, **2009**, *42*, 339–341.
- [3] A. L. Spek, *Acta Cryst.*, 2015, *C71*, 9–18.
